# Supplementary material for: Beyond Mechanical Recycling: Giving New Life to Plastic Waste
Source: PubMed Central journal article supplement (PMC7497176; doi:10.1002/anie.201915651), 2020-06-25
Supplement: ANIE-59-15402-s001.pdf [file ANIE-59-15402-s001.pdf]

Supporting Information

**Beyond Mechanical Recycling: Giving New Life to Plastic Waste**

*Ina Vollmer, Michael J. F. Jenks, Mark C. P. Roelands, Robin J. White, Toon van Harmelen, Paul de Wild, Gerard P. van der Laan, Florian Meirer, Jos T. F. Keurentjes, and Bert M. Weckhuysen\**

anie\_201915651\_sm\_miscellaneous\_information.pdf

# Beyond Mechanical Recycling: Giving New Life to Plastic Waste

Ina Vollmer<sup>a</sup>, Michael J. F. Jenks<sup>a</sup>, Mark C. P. Roelands<sup>b</sup>, Robin J. White<sup>c</sup>, Toon van Harmelen<sup>d</sup>, Paul de Wild<sup>e</sup>, Gerard P. van der Laan<sup>e</sup>, Florian Meirer<sup>a</sup>, Jos T. F. Keurentjes<sup>f</sup>, Bert M. Weckhuysen<sup>a,\*</sup>

- a. Inorganic Chemistry and Catalysis, Debye Institute for Nanomaterials Science, Universiteitsweg 99, 3584 CG Utrecht, The Netherlands
- b. The Netherlands Organisation for Applied Scientific Research (TNO), Leeghwaterstraat 44, 2628 CA Delft, The Netherlands
- c. The Netherlands Organisation for Applied Scientific Research (TNO), Materials Solutions Department, High Tech Campus 25, 5656 AE Eindhoven, The Netherlands
- d. The Netherlands Organisation for Applied Scientific Research (TNO), Climate, Air & Sustainability Department, Princetonlaan 6, 3584 CB Utrecht, The Netherlands.
- e. Energieonderzoek Centrum Nederland (ECN)- part of TNO, Biomass & Energy Efficiency, Westerduinweg 3, 1755 LE Petten, The Netherlands
- f. University of Twente, Department of Energy Innovation, POB 217, 7500 AE Enschede, The Netherlands

**E-mail:** b.m.weckhuysen@uu.nl

## Table of Contents

|                                                              |    |
|--------------------------------------------------------------|----|
| Table of Contents .....                                      | 1  |
| S1 Summary of review articles .....                          | 2  |
| S2 Role of chemical recycling in a circular economy.....     | 8  |
| S3 Life Cycle Analysis of Chemical Recycling Processes ..... | 34 |
| S4 Analysis of Most Researched Processes and Plastics .....  | 36 |
| S4.1 Method .....                                            | 36 |
| S5 List of References .....                                  | 39 |

**Table S1:** Summary of review articles

| <b><u>Title: (published date/ first available online)</u></b>                                                        | <b><u>Journal:</u></b>                   | <b><u>Resin identification code discussed:</u></b> | <b><u>Process:</u></b> | <b><u>Take away messages:</u></b>                                                                                                                                                                                                                                                                                                                                                                                                                  |
|----------------------------------------------------------------------------------------------------------------------|------------------------------------------|----------------------------------------------------|------------------------|----------------------------------------------------------------------------------------------------------------------------------------------------------------------------------------------------------------------------------------------------------------------------------------------------------------------------------------------------------------------------------------------------------------------------------------------------|
| <b>A review on pyrolysis of plastic wastes</b> <sup>[1]</sup><br>(March 2016)                                        | Energy Conversion and Management         | 1,2,3,4,5,6                                        | Pyrolysis              | <ul style="list-style-type: none"> <li>- fluidised bed has the greatest economic potential for pyrolysis of plastic</li> <li>- microwave-assisted pyrolysis offers benefits although inconsistent dielectric properties mean real waste streams are difficult to handle</li> <li>- measurable impact of various carrier gasses with H<sub>2</sub> producing the least coke and Ar the most with the opposite trend in olefin production</li> </ul> |
| <b>A review on tertiary recycling of high-density polyethylene to fuel</b> <sup>[2]</sup><br>(May 2011)              | Resources, Conservation and Recycling    | 2                                                  | Pyrolysis              | <ul style="list-style-type: none"> <li>- reaction pathways are temperature dependent highlighting importance in understanding heat and mass transfer limitations</li> <li>- a wide variety of catalysts have been tested, each giving different product distributions</li> </ul>                                                                                                                                                                   |
| <b>Chemical recycling of plastics using sub- and supercritical fluids</b> <sup>[3]</sup><br>(October 2008)           | The Journal of Supercritical Fluids      | 1,2,4,7                                            | Solvolyis              | <ul style="list-style-type: none"> <li>- supercritical 'solvents' allow for chemical recycling of certain crosslinked polyethylene (thermoset) without depolymerisation</li> <li>- supercritical conditions can allow for almost 100 % monomer recovery from PET</li> </ul>                                                                                                                                                                        |
| <b>Chemical recycling of waste plastics for new materials production</b> <sup>[4]</sup><br>(June 2017)               | Nature Reviews Chemistry                 | 1,2,3,4,5,6,7                                      | Solvolyis, Pyrolysis   | <ul style="list-style-type: none"> <li>- Hurdles to commercialization are financial incentives and catalyst effectiveness</li> <li>- Unique issues with each type of plastic highlighting the importance of reducing mixed polymer plastics</li> <li>- Progress in design for recycling of polymers will facilitate chemical recycling</li> </ul>                                                                                                  |
| <b>Current state and future prospects of plastic waste as source of fuel: A review</b> <sup>[5]</sup><br>(June 2015) | Renewable and Sustainable Energy Reviews | 2,4,5                                              | Pyrolysis              | <ul style="list-style-type: none"> <li>- generally for PO pyrolysis: <ul style="list-style-type: none"> <li>- thermal pyrolysis occurs through free radical mechanism</li> <li>- catalytic pyrolysis proceeds through carbonium mechanism</li> </ul> </li> </ul>                                                                                                                                                                                   |

|                                                                                                                                            |                                               |               |               |                                                                                                                                                                                                                                                                                                                                                                                                                                                                                                         |
|--------------------------------------------------------------------------------------------------------------------------------------------|-----------------------------------------------|---------------|---------------|---------------------------------------------------------------------------------------------------------------------------------------------------------------------------------------------------------------------------------------------------------------------------------------------------------------------------------------------------------------------------------------------------------------------------------------------------------------------------------------------------------|
|                                                                                                                                            |                                               |               |               | <ul style="list-style-type: none"> <li>- importance of pre-treatment prior to pyrolysis for high quality fuel products</li> </ul>                                                                                                                                                                                                                                                                                                                                                                       |
| <b>Developing Advanced Catalysts for the Conversion of Polyolefin Waste Plastics into Fuels and Chemicals<sup>[6]</sup></b><br>(July 2012) | ACS Catalysis                                 | 2,4,5         | Pyrolysis     | <ul style="list-style-type: none"> <li>- importance of accessibility of acid sites, promoted through large pore size or increasing surface area through decreased catalyst crystal size</li> <li>- further study into deactivation and regeneration of catalysts need to be better understood</li> <li>- two-step process holds great potential decoupling impurity removal/pre-processing with catalytically sensitive product formation</li> <li>- large list of potential catalysts given</li> </ul> |
| <b>Fuels from Waste Plastics by Thermal and Catalytic Processes: A Review<sup>[7]</sup></b><br>(October 2008)                              | Industrial and Engineering Chemistry Research | 2,3,4,5,6     | Pyrolysis     | <ul style="list-style-type: none"> <li>- reactor type and operating mode has large influence on product distribution due to heat and mass transfer limitations</li> <li>- two stage processing results in better quality fuel</li> <li>- the use of a solvent in the reactor can alter reaction mechanism and improve product distribution</li> <li>- recirculation and use of pyrolysis gas as fluidising gas promotes BTX formation in 600 – 800 °C</li> </ul>                                        |
| <b>Hydrocracking of virgin and waste plastics: A detailed review<sup>[8]</sup></b><br>(April 2018)                                         | Renewable and Sustainable Energy Reviews      | 1,2,3,4,5,6,7 | Hydrocracking | <ul style="list-style-type: none"> <li>- kinetics of hydrocracking and deactivation methods not well understood</li> <li>- dependence on plastic type for optimum process conditions</li> </ul>                                                                                                                                                                                                                                                                                                         |
| <b>PET Waste Management by Chemical Recycling: A Review<sup>[9]</sup></b><br>(September 2008)                                              | Journal of Polymers and the Environment       | 1             | Solvolyis     | <ul style="list-style-type: none"> <li>- Polyethylene terephthalate (PET) polymer is difficult to purify once formed, so recycling needs to yield a very pure monomer to allow for repolymerization</li> <li>- Large variety of PET available due to differing degrees of crystallinity</li> <li>- Risks that legislation aims at eliminating polymers that have highest potential for recycling, like PET</li> </ul>                                                                                   |

|                                                                                                                                                                                                |                                           |               |                       |                                                                                                                                                                                                                                                                                                                                                                                                           |
|------------------------------------------------------------------------------------------------------------------------------------------------------------------------------------------------|-------------------------------------------|---------------|-----------------------|-----------------------------------------------------------------------------------------------------------------------------------------------------------------------------------------------------------------------------------------------------------------------------------------------------------------------------------------------------------------------------------------------------------|
| <b>Plastics to fuel: a review</b> <sup>[10]</sup><br>(November 2015)                                                                                                                           | Renewable and Sustainable Energy Reviews  | 2,3,4,5,6     | Pyrolysis             | <ul style="list-style-type: none"> <li>- work required to reduce costs associated with catalytic process</li> <li>- heating rates of plastic impact the product distribution</li> <li>- current legislation and economic driving forces do not create a market for plastic derived fuel oil</li> </ul>                                                                                                    |
| <b>Recycling and recovery routes of plastic solid waste (PSW): A review</b> <sup>[11]</sup><br>(July 2009)                                                                                     | Waste Management                          | 1,2,3,4,5     | Pyrolysis             | <ul style="list-style-type: none"> <li>- various recycling methods complement each other, there is no single recycling solution at this stage</li> </ul>                                                                                                                                                                                                                                                  |
| <b>Recycling of waste from polymer materials: An overview of the recent works</b> <sup>[12]</sup><br>(October 2013)                                                                            | Polymer Degradation and Stability         | 1,7           | Solvolyis             | <ul style="list-style-type: none"> <li>- interesting suggestion that combining polymer types with 'compatibilizers' is the best option for mechanical recycling - how many rounds of recycling does this work for</li> </ul>                                                                                                                                                                              |
| <b>The valorisation of plastic solid waste (PSW) by primary to quaternary routes: From re-use to energy and chemicals</b> <sup>[13]</sup><br>(October 2009)                                    | Progress in Energy and Combustion Science | 1,2,3,4,5,6,7 | Pyrolysis             | <ul style="list-style-type: none"> <li>- important to design future plastics with recycling (mechanical or chemical) in mind</li> <li>- proper assessment of waste streams i.e. through LCA is vital to properly compare and develop waste processing techniques</li> </ul>                                                                                                                               |
| <b>Thermal degradation of PVC: A review</b> <sup>[14]</sup><br>(December 2015)                                                                                                                 | Waste Management                          | 3             |                       | <ul style="list-style-type: none"> <li>- in HCl environment dechlorination is autocatalytic</li> <li>- additives, especially stabiliser, can have a large impact on dechlorination process</li> </ul>                                                                                                                                                                                                     |
| <b>Thermochemical routes for the valorisation of waste polyolefin plastics to produce fuels and chemicals. A review</b> <sup>[15]</sup><br>(January 2017)                                      | Renewable and Sustainable Energy Reviews  | 2,4,5         | Pyrolysis             | <ul style="list-style-type: none"> <li>- Reactor design and process conditions crucial for tuning product distribution due to heat and mass transfer limitations in processing waste plastic</li> <li>- Importance of (acid) catalyst for reducing reaction temperatures</li> </ul>                                                                                                                       |
| <b>Thermolysis of waste plastics to liquid fuel: A suitable method for plastic waste management and manufacture of value added products—A world prospective</b> <sup>[16]</sup><br>(July 2009) | Renewable and Sustainable Energy Reviews  | 2,3,4,5,6     | Mechanical, Pyrolysis | <ul style="list-style-type: none"> <li>- future research should focus on more selective and regeneratable catalysts as well as real plastic waste</li> <li>- mechanisms of depolymerisation summarised</li> <li>- overview of process design considerations and impact on chemical recycling</li> <li>- brief overview of some companies working in the field of chemical recycling of plastic</li> </ul> |

|                                                                                                                                                                     |                                                    |                                    |                    |                                                                                                                                                                                                                                                                                                                                                                                                                                                                                                                                                                                                                                                                                  |
|---------------------------------------------------------------------------------------------------------------------------------------------------------------------|----------------------------------------------------|------------------------------------|--------------------|----------------------------------------------------------------------------------------------------------------------------------------------------------------------------------------------------------------------------------------------------------------------------------------------------------------------------------------------------------------------------------------------------------------------------------------------------------------------------------------------------------------------------------------------------------------------------------------------------------------------------------------------------------------------------------|
| <p><b>Waste Polyolefins to Liquid Fuels via Pyrolysis: Review of Commercial State-of-the-Art and Recent Laboratory Research</b><sup>[17]</sup><br/>(April 2011)</p> | <p>Waste and Biomass Valorisation</p>              | <p>1,2,3,4,5,6</p>                 | <p>Pyrolysis</p>   | <ul style="list-style-type: none"> <li>- requirement for waste management legislation to keep up with waste production, processing methods and environmental targets</li> <li>- issues for industrialisation include, catalyst coking, fouling, HCl above 200 ppm</li> <li>- opportunities to crack plastic into suitable feed for industrial scale units</li> </ul>                                                                                                                                                                                                                                                                                                             |
| <p><b>Recycling of polyurethanes from laboratory to industry, a journey towards the sustainability</b><sup>[18]</sup><br/>(April 2018)</p>                          | <p>Waste Management</p>                            | <p>7</p>                           | <p>Solvolytic</p>  | <ul style="list-style-type: none"> <li>- single-phase glycolysis of polyurethane yields a variety of monomers that do not allow for reconstruction of flexible foams</li> <li>- split-phase glycolysis provides potential for recovery of monomers for flexible PU as well, although currently only developed to pilot scale due to costs of cleavage agent</li> </ul>                                                                                                                                                                                                                                                                                                           |
| <p><b>Catalytic pyrolysis of plastic waste: A review</b><sup>[19]</sup><br/>(June 2016)</p>                                                                         | <p>Process Safety and Environmental Protection</p> | <p>1,2,3,4,5,6</p>                 | <p>Pyrolysis</p>   | <ul style="list-style-type: none"> <li>- geometrical limitations of catalysts result in wax formation on the surface of catalysts with smaller products (gasses) formed on the internal sites</li> <li>- pore clogging is an important factor to consider with limited trials focussing on regeneration of catalyst</li> <li>- deposits of impurities on the catalyst affect the activity but also remove these impurities from final product</li> <li>- contains a table (Table 4) with various catalysts and their effect on the pyrolysis products</li> <li>- investigation into cheaper and regeneration of catalysts to be investigated for industrial operation</li> </ul> |
| <p><b>A review of polymer dissolution</b><sup>[20]</sup><br/>(July 2003)</p>                                                                                        | <p>Progress in Polymer Science</p>                 | <p>None specifically mentioned</p> | <p>Dissolution</p> | <ul style="list-style-type: none"> <li>- increased molecular weight results in decreased dissolution rate (chain disentanglement is a function of Mw)</li> <li>- polydisperse samples have greater dissolution rate than monodispersed samples</li> </ul>                                                                                                                                                                                                                                                                                                                                                                                                                        |
| <p><b>Solvent-based separation and recycling of waste plastics: A review</b><sup>[21]</sup><br/>(June 2018)</p>                                                     | <p>Chemosphere</p>                                 | <p>1,2,3,4,5,6,7</p>               | <p>Dissolution</p> | <ul style="list-style-type: none"> <li>- Gives details of strong and weak solvents for the various polymer types.</li> </ul>                                                                                                                                                                                                                                                                                                                                                                                                                                                                                                                                                     |

|                                                                                                                                |                                   |               |                                                  |                                                                                                                                                                                                                                                                                                                                                                                                                                                                                                                                                                                                                                                                        |
|--------------------------------------------------------------------------------------------------------------------------------|-----------------------------------|---------------|--------------------------------------------------|------------------------------------------------------------------------------------------------------------------------------------------------------------------------------------------------------------------------------------------------------------------------------------------------------------------------------------------------------------------------------------------------------------------------------------------------------------------------------------------------------------------------------------------------------------------------------------------------------------------------------------------------------------------------|
|                                                                                                                                |                                   |               |                                                  | <ul style="list-style-type: none"> <li>- Solvent extraction from recycled polymer can cause damage to the polymer chain due to thermal stress.</li> <li>- Dissolution of mixed polymer streams results in poorer separation of the target polymer.</li> <li>- Future use of hazardous solvents should be reduced</li> </ul>                                                                                                                                                                                                                                                                                                                                            |
| <p><b>Mechanical and chemical recycling of solid plastic waste</b><sup>[22]</sup><br/>(August 2017)</p>                        | Waste Management                  | 1,2,3,4,5,6,7 | Mechanical, solvolysis, hydrocracking, pyrolysis | <ul style="list-style-type: none"> <li>- Overview over both mechanical and chemical recycling methods with comparison of limitations, advantages and disadvantages of the different processes</li> <li>- Degradation during mechanical recycling limits closed-loop recycling although mitigated through stabilisers and compatibilisers</li> <li>- Design For Recycling and From Recycling are important in realising a circular economy for plastic</li> <li>- Cl and N in waste stream deactivate catalysts in addition to inorganic components blocking pores</li> <li>- Overview and analysis provided of various commercial projects and their status</li> </ul> |
| <p><b>Catalytic co-pyrolysis of lignocellulosic biomass with polymers: a critical review</b><sup>[23]</sup><br/>(May 2016)</p> | Green Chemistry                   | 1,2,3,4,5,6,7 | Pyrolysis                                        | <ul style="list-style-type: none"> <li>- discussion of synergistic effects on the mechanism between biomass and plastics</li> <li>- lists provided for results of non-catalytic (Table 2) and catalytic (Table 4) co-pyrolysis</li> <li>- alkali metals from the biomass have significant impact on product distribution as they can catalyse the overcracking of the polymer chains</li> </ul>                                                                                                                                                                                                                                                                        |
| <p><b>Recycling of PVC wastes</b><sup>[24]</sup><br/>(April 2011)</p>                                                          | Polymer Degradation and Stability | 3             | Mechanical, pyrolysis                            | <ul style="list-style-type: none"> <li>- usability of mechanically recycled PVC depends on its application (bottles performed very badly whereas pipes were acceptable)</li> <li>- processes that chemically modify the PVC prior to recycling have been developed but are generally more expensive than mechanical recycling</li> </ul>                                                                                                                                                                                                                                                                                                                               |

|  |  |  |  |                                                                                                                                                                                                                                                         |
|--|--|--|--|---------------------------------------------------------------------------------------------------------------------------------------------------------------------------------------------------------------------------------------------------------|
|  |  |  |  | <ul style="list-style-type: none"><li>- pyrolysis of PVC usually involves a pre-processing step to remove HCl</li><li>- limited numerical data on the recycling and separation of PVC has halted the industrial implementation of new systems</li></ul> |
|--|--|--|--|---------------------------------------------------------------------------------------------------------------------------------------------------------------------------------------------------------------------------------------------------------|

Furthermore, interesting books in the field include:

- Feedstock Recycling and Pyrolysis of Waste Plastics: Converting Waste Plastics into Diesel and Other Fuels
- Material Recycling Trends and Perspectives



## S2 Role of chemical recycling in a circular economy

**Table S2.** Companies and start-ups active in different fields of chemical recycling via dissolution/precipitation.

| <u>Type of process</u>    | <u>Process name</u> | <u>Company details:</u>                                                                                                                                            | <u>Status:</u>                                                                                                        | <u>Process description:</u> | <u>Patent:</u>                                                                                                                                                                                                                                                                                                              | <u>Input:</u>                                       | <u>product:</u>            | <u>Country of operation:</u> |
|---------------------------|---------------------|--------------------------------------------------------------------------------------------------------------------------------------------------------------------|-----------------------------------------------------------------------------------------------------------------------|-----------------------------|-----------------------------------------------------------------------------------------------------------------------------------------------------------------------------------------------------------------------------------------------------------------------------------------------------------------------------|-----------------------------------------------------|----------------------------|------------------------------|
| dissolution/precipitation | Newcycling          | <b>APK AG</b><br>www.apk-ag.de                                                                                                                                     | commercial plant 2018, capacity: 8000 megatonnes/year, 2nd plant with 25000 megatonnes/year capacity planned for 2020 |                             | DE102016015197A1,<br>DE102016015199A1<br>Solvent and method for dissolving at least two plastics from a solid within a suspension                                                                                                                                                                                           | multilayer films                                    | pure PA, PE granulates     | Germany                      |
| dissolution/precipitation | Creasolv® Process   | <b>CreaCycle GmbH</b><br>https://www.creacycle.de/en/<br>partners:<br>Fraunhofer IVV                                                                               | Technology licensing and plant design                                                                                 | dissolution                 |                                                                                                                                                                                                                                                                                                                             |                                                     |                            | Germany                      |
| dissolution/precipitation | Creasolv® Process   | <b>Fraunhofer IVV</b><br>https://www.ivv.fraunhofer.de/de/pressinformationen/circular-packaging.html<br>partners: Lober GmbH & Co. Abfallentsorgungs KG, LÖMI GmbH |                                                                                                                       | dissolution                 | WO2006131376A1, Method for recycling plastics and use thereof, WO2015000681<br>Method for increasing the concentration of at least one polymer from a polymer-containing waste material, and polymer recycle 1997,EP0894818B1<br>Process for recycling soluble polymers or polymer blends from plastic containing materials | multilayer films<br>PP/PET,<br>PE/PA plus aluminium | pure polymers<br>PE and PP | Germany                      |
| dissolution/precipitation | Creasolv® Process   | <b>Lober GmbH/LÖMI GmbH</b>                                                                                                                                        | demonstration plant planned                                                                                           | dissolution                 |                                                                                                                                                                                                                                                                                                                             | multilayer packaging film                           | polyolefins                | Germany                      |

|                           |                   |                                                                                                                                                                                                                                                                                                                                                         |                                                                                                                               |                                                                                                                                                                      |                                                                |                                                                           |    |           |
|---------------------------|-------------------|---------------------------------------------------------------------------------------------------------------------------------------------------------------------------------------------------------------------------------------------------------------------------------------------------------------------------------------------------------|-------------------------------------------------------------------------------------------------------------------------------|----------------------------------------------------------------------------------------------------------------------------------------------------------------------|----------------------------------------------------------------|---------------------------------------------------------------------------|----|-----------|
| dissolution/precipitation | CreaSolv® Process | <b>PolyStyreneLoop</b><br><a href="https://polystyrene-loop.org">https://polystyrene-loop.org</a><br>partners: partners: ICL-IP, BEWiSynbra, Fraunhofer IVV<br>Members & supporters: +70 across the entire PS-value chain from all over Europe                                                                                                          | Construction for demonstration plant in Terneuzen, the Netherlands started in December 2019<br>capacity: 3300 tonnes/year     | dissolution                                                                                                                                                          |                                                                | PS-foam (HBCD included)<br>Current focus EPS, working on treatment of XPS | PS | NL        |
| dissolution/precipitation | CreaSolv® Process | <b>Unilever</b><br><a href="https://www.unilever.com/news/news-and-features/Feature-article/2018/our-solution-for-recycling-plastic-sachets-takes-another-step-forward.html">https://www.unilever.com/news/news-and-features/Feature-article/2018/our-solution-for-recycling-plastic-sachets-takes-another-step-forward.html</a><br>partners: Creacycle | pilot plant in Indonesia                                                                                                      | using CreaSolv technology for separation of PE multi-layer films                                                                                                     |                                                                | PE multilayer films                                                       |    | Indonesia |
| dissolution/precipitation |                   | <b>Polystyvert</b><br><a href="http://www.polystyvert.com/en/">http://www.polystyvert.com/en/</a><br>partners: Total                                                                                                                                                                                                                                    | Technology licensing business with patents pending for process<br>capacity: around 1000 tonnes/year assuming 8000 h operation | solvent cymene                                                                                                                                                       | WO2016049782A1<br>processes for recycling polystyrene waste    | PS                                                                        | PS | Canada    |
| dissolution/precipitation |                   | <b>PVC Separation</b><br><a href="https://www.pvcseparation.com/">https://www.pvcseparation.com/</a>                                                                                                                                                                                                                                                    |                                                                                                                               | delaminate multilayers by swelling the polymer in a low boiling solvent, followed by exposure to hot water, causing the solvent to flash and releasing the materials | WO2018035565A1<br>Separating polymer from composite structures | multilayer films                                                          |    | Australia |

|                           |  |                                                                                             |                                                                       |                                                                                                                                                                                                                                                                                        |                                                                                                                                                                     |                  |  |         |
|---------------------------|--|---------------------------------------------------------------------------------------------|-----------------------------------------------------------------------|----------------------------------------------------------------------------------------------------------------------------------------------------------------------------------------------------------------------------------------------------------------------------------------|---------------------------------------------------------------------------------------------------------------------------------------------------------------------|------------------|--|---------|
| dissolution/precipitation |  | <b>Saperatec</b><br><a href="https://www.saperatec.de/en/">https://www.saperatec.de/en/</a> | operation of recycling plant mid 2021<br>capacity: 18,000 tonnes/year | reducing the interfacial forces of PET, PE and aluminium composites using separation fluids, for instance a micro-emulsion of an organic solvent, for swelling and a carboxylic acid for the acceleration of the separation to delaminate the films, the separation liquid is recycled | US20130319618A1<br>Separating Fluid, Method And System For Separating Multilayer Systems<br>WO2015169801A1<br>Method and apparatus for recycling packaging material | multilayer films |  | Germany |
|---------------------------|--|---------------------------------------------------------------------------------------------|-----------------------------------------------------------------------|----------------------------------------------------------------------------------------------------------------------------------------------------------------------------------------------------------------------------------------------------------------------------------------|---------------------------------------------------------------------------------------------------------------------------------------------------------------------|------------------|--|---------|

**Table S3.** Companies and start-ups active in different fields of chemical recycling via solvolysis.

| <i>Type of process</i> | <i>Process name</i> | <i>Company details:</i>                                                                                                                                                                 | <i>Status:</i>                                                                                                       | <i>Process description:</i>                                                                                                                       | <i>Patent:</i> | <i>Input:</i> | <i>product:</i>     | <i>Country of operation:</i> |
|------------------------|---------------------|-----------------------------------------------------------------------------------------------------------------------------------------------------------------------------------------|----------------------------------------------------------------------------------------------------------------------|---------------------------------------------------------------------------------------------------------------------------------------------------|----------------|---------------|---------------------|------------------------------|
| glycolysis             | CuRE                | <b>CuRE</b><br><a href="https://curepolyester.com/about-cure/">https://curepolyester.com/about-cure/</a><br>partners: Cumapol, DSM-Niaga, DuFor and Morssinkhof, NHL Stenden University | pilot plant to be built in 2020, funding partners of the CuRe project are SNN, Province of Drenthe and the EU (EFRO) | PET chains are broken up to oligomers by glycolysis, followed by removal of impurities from the solution before repolymerization to longer chains |                | polyester     | polyester granulate |                              |
| glycolysis             | ChemPET             | <b>Garbo</b><br><a href="http://www.garbosrl.net/chempet-project/?lang=en">http://www.garbosrl.net/chempet-project/?lang=en</a>                                                         | ChemPET project is funded by H2020                                                                                   |                                                                                                                                                   |                | PET           | BHET                | Italy                        |

|                               |                |                                                                                                                                                                                                                                                                   |                                                                   |                                                                                                                                                                                          |                                                                                                           |             |                |       |
|-------------------------------|----------------|-------------------------------------------------------------------------------------------------------------------------------------------------------------------------------------------------------------------------------------------------------------------|-------------------------------------------------------------------|------------------------------------------------------------------------------------------------------------------------------------------------------------------------------------------|-----------------------------------------------------------------------------------------------------------|-------------|----------------|-------|
| glycolysis                    | VOLCAT         | <b>IBM</b><br><a href="https://newsroom.ibm.com/2019-02-11-IBM-Researchers-Develop-Radical-New-Recycling-Process-to-Transform-Old-Plastic">https://newsroom.ibm.com/2019-02-11-IBM-Researchers-Develop-Radical-New-Recycling-Process-to-Transform-Old-Plastic</a> |                                                                   | glycolysis at ~200 C under pressure, catalyst: volatile organocatalyst (1,5,7-triazabicyclo[4.4.0]dec-5-ene (TBD))                                                                       | WO2015056377, Methods and materials for depolymerizing polyesters                                         | PET         | BHET           |       |
| glycolysis                    |                | <b>PerPETual</b><br><a href="https://www.perpetual-global.com/">https://www.perpetual-global.com/</a><br>Adidas, H&M, Zara, Puma, Vero Moda and Decathlon                                                                                                         | Ca. 2 million plastic bottles per day in a plant in Nashik, India | deconstruct PET chains to low Mw oligomers, followed impurity removal before repolymerization to longer chains                                                                           | WO2013175497A1, Flakes of ester mixtures and methods for their production                                 | PET bottles | Polyester yarn | India |
| glycolysis                    |                | <b>ioniqa</b><br><a href="http://www.ioniqa.com/">http://www.ioniqa.com/</a>                                                                                                                                                                                      | 10 kilotonne/year plant in NL operational since 2019              | dissolution in ionic liquids/catalytic glycolysis with ethylene glycol, catalyst: magnetic nanoparticle with an positively charged aromatic moiety and a negatively charged salt complex | WO2016105198A1 Improved reusable capture complex; WO2014209117A1 Polymer degradation                      | PET         | BHET           | NL    |
| microwave assisted glycolysis | Demeto-process | <b>Demeto</b><br><a href="https://www.demeto.eu/">https://www.demeto.eu/</a>                                                                                                                                                                                      |                                                                   |                                                                                                                                                                                          | WO2013014650A1 Method and apparatus for the recycling of polymeric materials via depolymerization process | PET         | EG, TPA        |       |

|                                               |                |                                                                                                                                                                                                                                                                                     |                               |                                                                    |                                                                                                              |           |          |             |
|-----------------------------------------------|----------------|-------------------------------------------------------------------------------------------------------------------------------------------------------------------------------------------------------------------------------------------------------------------------------------|-------------------------------|--------------------------------------------------------------------|--------------------------------------------------------------------------------------------------------------|-----------|----------|-------------|
| microwave assisted glycolysis                 | Demeto-process | <b>Gr3n</b><br><a href="http://gr3n-recycling.com/">http://gr3n-recycling.com/</a>                                                                                                                                                                                                  | pilot reactor built in 2014   |                                                                    | WO2013014650A1<br>Method and apparatus for the recycling of polymeric materials via depolymerization process | PET       | EG, TPA  | Switzerland |
| glycolysis                                    |                | <b>Eastman</b><br><a href="https://www.eastman.com/Company/News_Center/2019/Pages/Eastman-offers-innovative-recycling-technology-for-polyesters.aspx">https://www.eastman.com/Company/News_Center/2019/Pages/Eastman-offers-innovative-recycling-technology-for-polyesters.aspx</a> | engineering feasibility study |                                                                    | WO 2013025186 A1                                                                                             | polyester | monomers | USA         |
| basic alcoholysis/<br>dissolution or swelling |                | <b>LoopIndustries</b><br><a href="https://www.loopindustries.com/en/">https://www.loopindustries.com/en/</a>                                                                                                                                                                        |                               | catalyst: alkali metal, alkaline earth metal or ammonium hydroxide | WO2017007965A1,<br>Polyethylene terephthalate depolymerization                                               | PET       | PET      |             |

|            |        |                                                                                                                                                                                                                                                                                                                      |                                                                                                                                                            |                                                                                                                                                                                                         |                                                         |                                  |                                                                    |       |
|------------|--------|----------------------------------------------------------------------------------------------------------------------------------------------------------------------------------------------------------------------------------------------------------------------------------------------------------------------|------------------------------------------------------------------------------------------------------------------------------------------------------------|---------------------------------------------------------------------------------------------------------------------------------------------------------------------------------------------------------|---------------------------------------------------------|----------------------------------|--------------------------------------------------------------------|-------|
| hydrolysis | Econyl | <b>Aquafil</b><br><a href="https://www.greenbiz.com/article/better-recycling-through-chemistry">https://www.greenbiz.com/article/better-recycling-through-chemistry</a>                                                                                                                                              | Carpet recycling plant in Arizona and Phoenix, depolymerization takes place in Slovenia, capacity carpet recycling plants: 16,000 tonnes/year used carpets | carpets are first separated into nylon 6 (35%), polypropylene (15%) and calcium carbonate (50%) and then the nylon 6 is depolymerized into caprolactam through steam hydrolysis                         | WO2014072483<br>Method and device for treating polymers | carpets or other nylon scrap     | Caprolactam, which is then used to produce nylon 6 for new carpets | Italy |
|            | LuxCR  | <b>Teijin films</b><br><a href="https://www.plasticstoday.com/recycling/big-names-plastics-develop-technologies-push-forward-circular-economy/110194803760589">https://www.plasticstoday.com/recycling/big-names-plastics-develop-technologies-push-forward-circular-economy/110194803760589</a><br>Partners: DuPont |                                                                                                                                                            | Contamination is removed during the process through a combination of monomer and polymer filtration units and by vacuum extraction, which runs for several hours at temperatures between 270o and 300oC |                                                         | mechanically recovered PET flake | BHET                                                               |       |

**Table S4.** Companies and startups active in different fields of chemical recycling via pyrolysis.

| <i>Type of process</i> | <i>Process name</i> | <i>Company details:</i>                                                                                                                                                                 | <i>Status:</i>                                                                                                                                                                  | <i>Process description:</i> | <i>Patent:</i>     | <i>Input:</i> | <i>product:</i> | <i>Country of operation:</i> |
|------------------------|---------------------|-----------------------------------------------------------------------------------------------------------------------------------------------------------------------------------------|---------------------------------------------------------------------------------------------------------------------------------------------------------------------------------|-----------------------------|--------------------|---------------|-----------------|------------------------------|
| pyrolysis              |                     | <b>Agilyx</b><br><a href="https://www.agilyx.com/">https://www.agilyx.com/</a><br>partners: Ineos Styrolustion, Americas Styrenics, joint-venture Regenyx LLC together Chevron Phillips | opened chemical recycling facility in Tigard, Ore capacity: 10 tonnes of PS per day to be sold by Ineos Styrolustion and Americas Styrenics, plans a second facility with Ineos |                             | 2019, US10301235B1 | PS            | styrene monomer | USA                          |

|           |       |                                                                                                                                                                                                                                                                                                                                                                                                                                |                                                                                                                                                                         |                                                                                                                     |                                                                          |                                           |                 |         |
|-----------|-------|--------------------------------------------------------------------------------------------------------------------------------------------------------------------------------------------------------------------------------------------------------------------------------------------------------------------------------------------------------------------------------------------------------------------------------|-------------------------------------------------------------------------------------------------------------------------------------------------------------------------|---------------------------------------------------------------------------------------------------------------------|--------------------------------------------------------------------------|-------------------------------------------|-----------------|---------|
| pyrolysis |       | <b>Fuenix Ecogy</b><br><a href="http://www.fuenix.com/">http://www.fuenix.com/</a><br>partners: DOW                                                                                                                                                                                                                                                                                                                            | fully functioning recycling plant in Weert, NL                                                                                                                          |                                                                                                                     | 2014, NL2015089A<br>Rotary kiln and insufflator before                   |                                           | fuel            | NL      |
| pyrolysis |       | <b>Nexus Fuels</b><br><a href="https://www.nexusfuels.com/">https://www.nexusfuels.com/</a>                                                                                                                                                                                                                                                                                                                                    | Commercial plant built, proven and now in full operation, capacity: 50 tonnes/day, 16-18 kilotonnes/year, Planning on next phases of construction of stand-alone plants |                                                                                                                     |                                                                          |                                           | fuel            | USA     |
| pyrolysis |       | <b>Vadxx Energy LLC</b><br><a href="https://vadxx.com/">https://vadxx.com/</a>                                                                                                                                                                                                                                                                                                                                                 | currently raising additional funding                                                                                                                                    |                                                                                                                     | 2015, WO2013123377A1<br>Dual stage, zone-delineated pyrolysis apparatus. | mixed plastics                            | gas, fuel, coke |         |
| pyrolysis | ReOil | <b>OMV AG</b> (formerly Austrian Mineral Oil Administration)<br><a href="https://www.omv.com/en/blog/reoil-getting-crude-oil-back-out-of-plastic;">https://www.omv.com/en/blog/reoil-getting-crude-oil-back-out-of-plastic;</a><br><a href="https://www.chemicalprocessing.com/articles/2019/how-industry-tackles-plastics-plague/">https://www.chemicalprocessing.com/articles/2019/how-industry-tackles-plastics-plague/</a> | test facility with 100 kg/hr plastic waste processing capability and 100 l/hr output                                                                                    | solvent (a fraction obtained from crude oil) assisted pyrolysis with solvent recycle, temp: 350-450 C, catalyst: no | CA2834807C                                                               | PP, PE, PS and low amounts of PET and PVC | pyrolysis oil   | Austria |

|           |        |                                                                                                                                                                                                                                                                                                                                                 |                                                                                                                                                                                           |                              |                 |     |      |    |
|-----------|--------|-------------------------------------------------------------------------------------------------------------------------------------------------------------------------------------------------------------------------------------------------------------------------------------------------------------------------------------------------|-------------------------------------------------------------------------------------------------------------------------------------------------------------------------------------------|------------------------------|-----------------|-----|------|----|
| pyrolysis | TACOIL | <b>Plastic Energy</b><br><a href="https://plasticenergy.com/press-release-sabic-signs-memorandum-of-understanding-with-plastic-energy-for-supply-of-recycled-feedstock/">https://plasticenergy.com/press-release-sabic-signs-memorandum-of-understanding-with-plastic-energy-for-supply-of-recycled-feedstock/</a><br>partners: SABIC, Petronas | two chemical recycling plants in Seville and Almeria, operational since 2014 and 2017                                                                                                     | catalyst: no                 | US20120261247A1 | MPW | fuel | UK |
| pyrolysis |        | <b>VTT</b><br><a href="https://www.vttresearch.com/media/news/vtt-and-the-city-of-nokia-are-planning-plastic-recycling-in-the-eco3-business-park-in-nokia">https://www.vttresearch.com/media/news/vtt-and-the-city-of-nokia-are-planning-plastic-recycling-in-the-eco3-business-park-in-nokia</a>                                               | WasteBuster research project                                                                                                                                                              |                              |                 |     |      |    |
| pyrolysis |        | <b>RES Polyflow</b><br><a href="http://www.respolyflow.com/">http://www.respolyflow.com/</a><br>partners: BP, AM WAX                                                                                                                                                                                                                            | vessel capable of handling 54 tpd. Currently looking to operate own facilities, long term looking to license technology<br>capacity: 18000 tonnes/year (EU) assuming 8000 hr/yr operation | pyrolysis (with pre-sorting) |                 | MPW | fuel |    |



|           |  |                                                                                                                                                 |                                                                                                                                                                                                                                                                                                                   |                                                                                                                                                                                                                                                                                                                                                                                             |                                                                              |               |                                        |                   |
|-----------|--|-------------------------------------------------------------------------------------------------------------------------------------------------|-------------------------------------------------------------------------------------------------------------------------------------------------------------------------------------------------------------------------------------------------------------------------------------------------------------------|---------------------------------------------------------------------------------------------------------------------------------------------------------------------------------------------------------------------------------------------------------------------------------------------------------------------------------------------------------------------------------------------|------------------------------------------------------------------------------|---------------|----------------------------------------|-------------------|
| pyrolysis |  | <b>Renewlogy</b><br><a href="http://renewlogy.com/projects/">http://renewlogy.com/projects/</a><br>partners: Sustane Technologies, Renew Oceans | Working on various projects including the Nova Scotia and Pheonix projects with modular design for system to process 2721 tonnes/year. Nova Scotia has completed warm commissioning and is expected to be operational during 2019. In addition, demonstration plant in Utah, USA. capacity: 2700 tonnes/year (EU) |                                                                                                                                                                                                                                                                                                                                                                                             |                                                                              | MPW           | fuel                                   |                   |
| pyrolysis |  | <b>Patpert</b><br><a href="http://www.patpert.in">www.patpert.in</a>                                                                            | 40 installations with plastic waste processing capacities, varying from 300 to 20.000 kg/day plastic waste and strives to roll-out technology in the Netherlands.                                                                                                                                                 | co-feeding plastic waste with a silica/alumina based cracking catalysts to the pyrolysis reactor at 350–360 °C and subsequent separation of other products from heavy wax fractions. These are fed to a secondary catalytic cracking, after followed by an integrated fractionation column equipped with a catalyst fixed bed of catalyst catalyst: silica/alumina based cracking catalysts | IN490MU2014<br>2015, Process of converting a polymer to hydrocarbon products | Plastic waste | fuel according to EN590-specifications | Netherlands/India |

|           |        |                                                                                                                          |                                                                                                                                                                        |               |                                                                                         |                                                                            |                                                                                                                                                           |         |
|-----------|--------|--------------------------------------------------------------------------------------------------------------------------|------------------------------------------------------------------------------------------------------------------------------------------------------------------------|---------------|-----------------------------------------------------------------------------------------|----------------------------------------------------------------------------|-----------------------------------------------------------------------------------------------------------------------------------------------------------|---------|
| pyrolysis |        | <b>Pyrocrat Systems</b><br><a href="https://www.pyrocratsystems.com/">https://www.pyrocratsystems.com/</a>               |                                                                                                                                                                        | catalyst: yes |                                                                                         |                                                                            | 50 to 90% of Pyrolysis oil (used as replacement to industrial diesel), 3 to 25% carbon black (used as replacement to coal powder in furnaces and boilers) | India   |
| pyrolysis | P2O    | <b>Plastic2Oil Inc.</b><br><a href="http://www.plastic2oil.com/site/home">http://www.plastic2oil.com/site/home</a>       | System scaled from lab - 1 ton - 20 ton scale (not time frame indicated) company moved to licensing its P2O technology in 2014 but returned to fuel production in 2018 |               | 2011, US20150001061A1, System and process for converting plastics to petroleum products | unsorted unwashed waste plastic (PO preferably) (PET and PVC not accepted) | fuel                                                                                                                                                      |         |
| pyrolysis | RT7000 | <b>Recycling Technologies</b><br><a href="https://recyclingtechnologies.co.uk/">https://recyclingtechnologies.co.uk/</a> | Selling units to process waste plastic into Plaxx oil - plan to have 1300 worldwide by 2027<br>capacity: 9000 tonnes/year waste                                        | catalyst: no  |                                                                                         | waste plastic                                                              | Plaxx (fuels and waxes)                                                                                                                                   | UK      |
| pyrolysis |        | <b>Alunova Pyrolysis</b><br><a href="https://www.alunova-recycling.de/home/">https://www.alunova-recycling.de/home/</a>  |                                                                                                                                                                        |               |                                                                                         | Aluminium containing waste                                                 | Aluminium and pyrolysis oil                                                                                                                               | Germany |



|                           |                                    |                                                                                                                                                    |                                                                                                                         |                                                                                                                                                                                                                                                                                                                                                  |                                                                                                                         |                                                                                                             |                                                                           |    |
|---------------------------|------------------------------------|----------------------------------------------------------------------------------------------------------------------------------------------------|-------------------------------------------------------------------------------------------------------------------------|--------------------------------------------------------------------------------------------------------------------------------------------------------------------------------------------------------------------------------------------------------------------------------------------------------------------------------------------------|-------------------------------------------------------------------------------------------------------------------------|-------------------------------------------------------------------------------------------------------------|---------------------------------------------------------------------------|----|
| microwave assisted        |                                    | <b>Enval Ltd.</b><br><a href="http://www.enval.com/">http://www.enval.com/</a>                                                                     | capacity: 2000 tonnes/year                                                                                              |                                                                                                                                                                                                                                                                                                                                                  |                                                                                                                         | plastic aluminium laminates                                                                                 | fuel                                                                      | UK |
| tribochemical pyrolysis   | catalytic tribochemical conversion | <b>Recenso GmbH</b><br><a href="https://recenso.eu/de/plastic-conversion.html">https://recenso.eu/de/plastic-conversion.html</a><br>partners: BASF | pilot plant, capacity: type CTCmodul2019: 400 l/h with 7,200 operation hours per year<br>TRL: 6/7                       | catalytic tribochemical conversion, friction is used to improve conversion, temp: below 400 C, atmospheric pressure, produced halogens are neutralized by being converted to a salt, at the inlet of the reactor the plastic waste is mixed with 'startup' oil, which is the heavy oil fraction recovered from the products<br>catalyst: zeolite |                                                                                                                         | SPW with 12 % humidity                                                                                      | 29% aromatics, 21% n-paraffins, 14% olefins, 11% naphthenes & i-paraffins |    |
| hydrothermal liquefaction |                                    | <b>RenaSci</b><br><a href="https://www.renasci.be/en">https://www.renasci.be/en</a><br>partners: BlueAlp, Petrogas, Mourik, Den Hartog BV          | constructing a 120000 tonnes/year facility for processing of MSW in Oostende, Belgium, capacity: 120000 tonnes/year MSW | sorting and recycling via hydrothermal liquefaction                                                                                                                                                                                                                                                                                              | US20180010050A1<br>Method and system for transferring plastic waste into a fuel having properties of diesel/heating oil | MSW                                                                                                         | EN590 diesel                                                              |    |
| hydrothermal liquefaction |                                    | <b>BlueAlp</b><br><a href="https://www.bluealp.nl/">https://www.bluealp.nl/</a>                                                                    | Technology licencing and plant design                                                                                   | pyrolysis with molten plastic feed, recycle of long chain hydrocarbons                                                                                                                                                                                                                                                                           | EP3247775A1<br>Method and system for transferring plastic waste into a fuel having properties of diesel/heating oil     | PE (LD/HD) / PP / PB 68 – 97 wt%, PS / EPS 0 – 25 wt%, PVC: max. 2 wt%, PET: max. 5 wt%, Water: max. 20 wt% | fuel                                                                      |    |

**Table S6.** Companies and start-ups active in different fields of upgrading of pyrolysis oil.

| <u>Type of process</u>  | <u>Process name</u> | <u>Company details:</u>                                                                                                                                                                                                                          | <u>Status:</u>                                                                                                                  | <u>Process description:</u>           | <u>Patent:</u> | <u>Input:</u> | <u>product:</u> | <u>Country of operation:</u> |
|-------------------------|---------------------|--------------------------------------------------------------------------------------------------------------------------------------------------------------------------------------------------------------------------------------------------|---------------------------------------------------------------------------------------------------------------------------------|---------------------------------------|----------------|---------------|-----------------|------------------------------|
| pyrolysis oil upgrading |                     | <b>Petronas</b><br><a href="https://plasticenergy.com/press-release-petronas-chemicals-signs-mou-with-plastic-energy/">https://plasticenergy.com/press-release-petronas-chemicals-signs-mou-with-plastic-energy/</a><br>partners: Plastic Energy | feasibility study                                                                                                               |                                       |                |               |                 |                              |
| pyrolysis oil upgrading | ChemCycle           | <b>BASF</b><br><a href="https://www.basf.com/global/en/media/news-releases/2018/12/p-18-385.html">https://www.basf.com/global/en/media/news-releases/2018/12/p-18-385.html</a><br>partners: Recenso GmbH                                         | first batch of pyrolysis oil fed to the steam cracker at site in Ludwigshafen in October 2018                                   | feeding oil to steam cracker at 850 C |                |               |                 |                              |
| pyrolysis oil upgrading |                     | <b>Dow</b><br><a href="https://www.plasticsnewseurope.com/news/virgin-plastics-producer-dow-goes-circular">https://www.plasticsnewseurope.com/news/virgin-plastics-producer-dow-goes-circular</a><br>partners: Fuenix Ecogy                      | pledged to incorporate at least 100,000 tonnes of recycled plastics in its product offerings sold in the European Union by 2025 | feeding pyrolysis oil to crackers     |                |               |                 |                              |

|                         |                           |                                                                                                                                                                                                                                                                                                                                                                                                                                                                                                                                                                              |                                                                                                                                                                                                                                  |                                                            |               |                                                                       |       |  |
|-------------------------|---------------------------|------------------------------------------------------------------------------------------------------------------------------------------------------------------------------------------------------------------------------------------------------------------------------------------------------------------------------------------------------------------------------------------------------------------------------------------------------------------------------------------------------------------------------------------------------------------------------|----------------------------------------------------------------------------------------------------------------------------------------------------------------------------------------------------------------------------------|------------------------------------------------------------|---------------|-----------------------------------------------------------------------|-------|--|
| pyrolysis oil upgrading | Cat-HTR                   | <b>Neste</b><br>partners: Licella, ReNew ELP                                                                                                                                                                                                                                                                                                                                                                                                                                                                                                                                 | aiming for an industrial-scale trial 2019 and eventually to process more than 1 million megatonnes/year of plastic waste by 2030                                                                                                 | Crack product from Cat-HCR further to produce monomers     |               |                                                                       |       |  |
| pyrolysis oil upgrading |                           | <b>SABIC</b><br><a href="https://plasticenergy.com/press-release-sabic-signs-memorandum-of-understanding-with-plastic-energy-for-supply-of-recycled-feedstock/">https://plasticenergy.com/press-release-sabic-signs-memorandum-of-understanding-with-plastic-energy-for-supply-of-recycled-feedstock/</a><br><a href="https://plasticenergy.com/sabic-and-customers-launch-certified-circular-polymers-from-mixed-plastic-waste/">https://plasticenergy.com/sabic-and-customers-launch-certified-circular-polymers-from-mixed-plastic-waste/</a><br>partners: Plastic Energy | memorandum of understanding signed with plastic-energy for plant in Geleen, NL. operation planned for 2021 (demonstration plant planned for 10,000-20,000 tonnes/year by 2022) SABIC also has many patents for conversion of MPW | Feeding TACOIL from plastic energy to their cracking units |               | virgin polymer                                                        | KSA   |  |
| pyrolysis oil upgrading | Polymer Energy technology | <b>MK Aromatics</b><br><a href="http://www.mkaromatics.com/">http://www.mkaromatics.com/</a><br>partners: M/s.Harita NTI Ltd.                                                                                                                                                                                                                                                                                                                                                                                                                                                | Operational plant in Tamilnadu                                                                                                                                                                                                   |                                                            | pyrolysis oil | various aromatic hydrocarbon solvents, aliphatic hydrocarbon solvents | India |  |

**Table S7.** Companies and start-ups active in supercritical polymer recycling, upcycling, design for recycling and enzymatic plastic degradation.

| <u>Type of process</u> | <u>Process name</u> | <u>Company details:</u>                                                                                                                                                                                                                                                                                                                                                   | <u>Status:</u>                                                                                            | <u>Process description:</u>                                                                                      | <u>Patent:</u>    | <u>Input:</u> | <u>product:</u> | <u>Country of operation:</u> |
|------------------------|---------------------|---------------------------------------------------------------------------------------------------------------------------------------------------------------------------------------------------------------------------------------------------------------------------------------------------------------------------------------------------------------------------|-----------------------------------------------------------------------------------------------------------|------------------------------------------------------------------------------------------------------------------|-------------------|---------------|-----------------|------------------------------|
| design for recycling   |                     | <b>Sustanetech</b><br><a href="https://sustanetech.com/about">https://sustanetech.com/about</a>                                                                                                                                                                                                                                                                           | Operational facility in Nova Scotia, Canada, capacity: 70000 tonnes/year of MSW                           |                                                                                                                  |                   | MSW           |                 | Canada                       |
| design for recycling   |                     | <b>DSM-Niaga</b><br><a href="https://www.dsm-niaga.com/what-we-do.html">https://www.dsm-niaga.com/what-we-do.html</a><br>partners: Cumapol, Mattex, Lacom                                                                                                                                                                                                                 | Full production facility in Geleen, Netherlands but the recollection of carpets is still in testing phase | carpet that is more easily recycled than caprolactam made from nylon 6, DuPonts nylon 6.6 harder to depolymerize | 2017, EP3475353A1 | carpet        |                 |                              |
| design for recycling   |                     | <b>Cumapol</b><br><a href="https://www.cumapol.nl/news/design4recycling-cumapet-104-100-top-layer/">https://www.cumapol.nl/news/design4recycling-cumapet-104-100-top-layer/</a><br><a href="https://www.cumapol.nl/news/topdutch-region-is-closing-the-plastic-loop/">https://www.cumapol.nl/news/topdutch-region-is-closing-the-plastic-loop/</a><br>partners: DSM-Niaga |                                                                                                           |                                                                                                                  |                   |               |                 |                              |

|                       |         |                                                                                                                                      |                                                                                                                                  |                                                                        |                                                                                                                             |            |                                                                                                              |           |
|-----------------------|---------|--------------------------------------------------------------------------------------------------------------------------------------|----------------------------------------------------------------------------------------------------------------------------------|------------------------------------------------------------------------|-----------------------------------------------------------------------------------------------------------------------------|------------|--------------------------------------------------------------------------------------------------------------|-----------|
| upcycling             |         | <b>BioCollection</b><br><a href="https://www.biocollection.com/">https://www.biocollection.com/</a>                                  |                                                                                                                                  | oxidative oligomerisation, <140 C, atmospheric pressure<br>catalyst: 2 | pending                                                                                                                     | HDPE, LDPE | valuable chemicals (succinic acid, glutaric acid, adipic acid, pimelic acid, suberic acid, and azelaic acid) | USA       |
| upcycling             |         | <b>Green Mantra</b><br><a href="http://greenmantra.com/">http://greenmantra.com/</a><br>partners: Ineos Styrolution                  | Pilot plant completed in 2014 for polyolefins processing. In 2018 started construction of demonstration plant for PS processing. | upcycling to produce waxes and additives<br>catalyst: yes              | 2015, US8664458B2<br>Method for producing waxes and grease base stocks through catalytic depolymerisation of waste plastics | polyolefin | 'value-added' waxes as additives (various applications)                                                      | Canada    |
| Enzymatic degradation |         | <b>Carbios</b><br><a href="https://carbios.fr/">https://carbios.fr/</a>                                                              |                                                                                                                                  |                                                                        | WO2017198786 A1<br>A process for degrading plastic products                                                                 | PET, PLA   |                                                                                                              | France    |
| supercritical         | Cat-HTR | <b>Licella</b><br><a href="https://www.licella.com.au/cat-htr/">https://www.licella.com.au/cat-htr/</a><br>partners: ReNew ELP, Mura | plastic recycling done on pilot plant for 10 years already                                                                       | supercritical water<br>catalyst: yes                                   | US20130276361A1                                                                                                             | MPW        |                                                                                                              | Australia |



|               |                      |                                                                                                              |                                                        |                                                                                                                                                                                                                                                                                                    |                                                                                                                                                    |                                                                                                                                                                                                                                          |                                                                                                               |     |
|---------------|----------------------|--------------------------------------------------------------------------------------------------------------|--------------------------------------------------------|----------------------------------------------------------------------------------------------------------------------------------------------------------------------------------------------------------------------------------------------------------------------------------------------------|----------------------------------------------------------------------------------------------------------------------------------------------------|------------------------------------------------------------------------------------------------------------------------------------------------------------------------------------------------------------------------------------------|---------------------------------------------------------------------------------------------------------------|-----|
| supercritical | Cat-HTR              | <b>ReNew ELP</b><br><a href="https://renewelp.co.uk/">https://renewelp.co.uk/</a><br>partners: Licella, Mura | commercial plant planned, capacity: 80,000 tonnes/year | residence time: 20-25 min; continuous; mixing; very good heat transfer, because heat is introduced internally through the supercritical water; energy recovery by using is for flash distillation; temperature and residence time are parameters used to tune product composition<br>catalyst: yes | US20130276361A1<br>Processing of organic matter<br>Additional patents filed but not yet in public domain- PCT application due for publication 2020 | End of life plastics unsuitable for mechanical recycling. Composite mixed polymers and organic contaminated waste plastic streams. Waste is sorted prior in a separate facility using IR and optical sorting; PVC content kept below 1 % | Products are distilled into separate fractions; Naphtha, Distillate Gas Oil, Heavy Gas Oil, Heavy Wax Residue | UK  |
| supercritical | process developed by | <b>PureCycle</b><br><a href="https://purecycletech.com/">https://purecycletech.com/</a><br>partners: P&G     | As of Jan 2019 facility was under construction         | remove odor and colour from waste plastic, dissolution of PP in supercritical butane followed by precipitation of PP upon lowering the pressure                                                                                                                                                    | WO2017003802A1<br>Articles of reclaimed polypropylene compositions                                                                                 | PP                                                                                                                                                                                                                                       | purified PP                                                                                                   | USA |

**Table S8.** List of companies and start-ups active in chemical recycling that are referenced in the CLP report<sup>[25]</sup>.

| <b><u>Company name:</u></b>                         | <b><u>Process type:</u></b>       |
|-----------------------------------------------------|-----------------------------------|
| <i>Agile Process Chemicals LLP</i>                  | pyrolysis                         |
| <i>AmberCycle (moral fiber)</i>                     | biological decomposition          |
| <i>Anhui Oursun Environmental Technologies</i>      | pyrolysis                         |
| <i>Aquafill</i>                                     | pyrolysis                         |
| <i>Axens</i>                                        | solvolysis                        |
| <i>Battery Resources</i>                            | n/a*                              |
| <i>Bioplasatech</i>                                 | biopolymer producer*              |
| <i>BioXycle</i>                                     | biological decomposition*         |
| <i>Biest</i>                                        | pyrolysis                         |
| <i>ByFusion</i>                                     | mechanical mixing*                |
| <i>Cadel Deinking</i>                               | delamination and additive removal |
| <i>Climax Global Energy</i>                         | pyrolysis (microwave)             |
| <i>Cogent Energy Systems</i>                        | gasification*                     |
| <i>Connora Technologies</i>                         | dissolution*                      |
| <i>EcoFuel Technologies</i>                         | pyrolysis                         |
| <i>Ecopek</i>                                       | purification                      |
| <i>Envion</i>                                       | pyrolysis*                        |
| <i>Equipolymers</i>                                 | polymer manufacture*              |
| <i>Esun</i>                                         | biopolymer producer*              |
| <i>Evrnu</i>                                        | mechanical recycling*             |
| <i>Fulcrum BioEnergy</i>                            | gasification                      |
| <i>FWD Energy</i>                                   | pyrolysis (microwave)*            |
| <i>GEEP (Global Electric Electronic Processing)</i> | pyrolysis*                        |
| <i>Generated Materials Recovery</i>                 | n/a*                              |
| <i>Genomatica</i>                                   | bio based intermediates producer* |
| <i>Geo-Tech Polymers</i>                            | purification                      |
| <i>Golden Renewable Energy</i>                      | pyrolysis                         |
| <i>Green EnviroTech Holdings</i>                    | pyrolysis*                        |
| <i>Illinois Sustainable Technology Center</i>       | purification and pyrolysis        |
| <i>Jeplan</i>                                       | solvolysis and pyrolysis          |
| <i>Jet Plastics</i>                                 | mechanical recycling*             |

|                                            |                                   |
|--------------------------------------------|-----------------------------------|
| <i>Karlsruhe Institute of Technology</i>   | pyrolysis                         |
| <i>MBA Polymers</i>                        | mechanical recycling*             |
| <i>Modular Genetics Inc.</i>               | bio based intermediates producer* |
| <i>Natureworks</i>                         | solvolysis                        |
| <i>New Hope Energy</i>                     | pyrolysis                         |
| <i>Next Generation</i>                     | purification                      |
| <i>Omnifusion</i>                          | additive infusion*                |
| <i>Opus12</i>                              | carbon dioxide to chemicals*      |
| <i>Origin Materials</i>                    | bio based polymer producer*       |
| <i>P4SB</i>                                | solvolysis*                       |
| <i>perPETual</i>                           | solvolysis                        |
| <i>Polycycl</i>                            | pyrolysis                         |
| <i>Pyrowave</i>                            | pyrolysis (microwave)             |
| <i>Quality Circular Polymers</i>           | mechanical recycling*             |
| <i>Re:NewCell</i>                          | mechanical recycling*             |
| <i>Reclaimed EcoEnergy</i>                 | purification                      |
| <i>Resinate Materials Group</i>            | solvolysis                        |
| <i>Resynergi</i>                           | pyrolysis                         |
| <i>RESYNTEX</i>                            | solvolysis*                       |
| <i>Sep-All</i>                             | n/a*                              |
| <i>Sierra Energy</i>                       | pyrolysis                         |
| <i>The Infinited Fiber Company Company</i> | n/a*                              |
| <i>The Pennsylvania State University</i>   | pyrolysis                         |
| <i>Total Corbion</i>                       | biopolymer producer*              |
| <i>TRASH2CASH</i>                          | solvolysis                        |
| <i>Tyton BioSciences</i>                   | solvolysis                        |
| <i>University of Massachusetts-Lowell</i>  | mechanical recycling*             |
| <i>University of Portsmouth</i>            | biological decomposition          |
| <i>University of Ulsan</i>                 | purification                      |
| <i>Valoren</i>                             | n/a*                              |
| <i>Klean Industries</i>                    | pyrolysis*                        |
| <i>Kyoto Institute of Technology</i>       | biological decomposition*         |

\* Companies not assigned a process type in the CLP report were categorised based upon information on their website. Where process type is not explicitly clear, it is left unassigned.

**Table S9.** Interview transcripts with start-up companies

| Question:                                                                                  | Saperatec                                                                                                                                                                                                                                                                                                                                                                                                                                                                                                                                                                                                                                                                                                                                                           | CreaCycle GmbH                                                                                                                                                                                                                                                                                                                                                                                                                                                                                                                 | Polystyvert                                                                                                                                                                                                                                                                                                                                                            | NeuxFuels                                                                                                                                                                                                                                                                                                                                                                                                                                                                                                                                                                                                                                                                                                                                                                                                                                                                                                                                                                                                                                | PolyStyreneLoop                                                                                                                                                                                                                                                                                                                                                                                                                                                                                                                                                                                                                                                                                                                                                                                                                                                                                                                                                                                                                           |
|--------------------------------------------------------------------------------------------|---------------------------------------------------------------------------------------------------------------------------------------------------------------------------------------------------------------------------------------------------------------------------------------------------------------------------------------------------------------------------------------------------------------------------------------------------------------------------------------------------------------------------------------------------------------------------------------------------------------------------------------------------------------------------------------------------------------------------------------------------------------------|--------------------------------------------------------------------------------------------------------------------------------------------------------------------------------------------------------------------------------------------------------------------------------------------------------------------------------------------------------------------------------------------------------------------------------------------------------------------------------------------------------------------------------|------------------------------------------------------------------------------------------------------------------------------------------------------------------------------------------------------------------------------------------------------------------------------------------------------------------------------------------------------------------------|------------------------------------------------------------------------------------------------------------------------------------------------------------------------------------------------------------------------------------------------------------------------------------------------------------------------------------------------------------------------------------------------------------------------------------------------------------------------------------------------------------------------------------------------------------------------------------------------------------------------------------------------------------------------------------------------------------------------------------------------------------------------------------------------------------------------------------------------------------------------------------------------------------------------------------------------------------------------------------------------------------------------------------------|-------------------------------------------------------------------------------------------------------------------------------------------------------------------------------------------------------------------------------------------------------------------------------------------------------------------------------------------------------------------------------------------------------------------------------------------------------------------------------------------------------------------------------------------------------------------------------------------------------------------------------------------------------------------------------------------------------------------------------------------------------------------------------------------------------------------------------------------------------------------------------------------------------------------------------------------------------------------------------------------------------------------------------------------|
| <p><b>1) In a few words, can you describe the process that your company developed?</b></p> | <p>Saperatec works on recycling solutions for multilayer composites. As a recycling company we develop separation fluids which work at the interface of multilayer materials and reduces the interfacial forces to delaminate individual layers from each other. An important criteria is that Saperatec does not dissolve a component of the composite and thus aim to reach close to 100% material recovery rates. The output materials of the process can directly integrated back in the same application field without energy intensive intermediate steps. Conclusively, saperatec process produces secondary raw material with high purity which has a positive carbon dioxide and energy footprint in comparison to virgin plastic material production.</p> | <p>From website: "The CreaSolv® Process does not fall into the classification "Chemical or Feedstock Recycling", because the chemical structure of the polymer chains remains unchanged, whereas chemical reactions produce other substances. The dissolution of plastics is a physical process, because the substance (plastic) only changes its physical state from solid to liquid, and this can also be reversed again. It is for this reason why the CreaSolv® Process has to be classified as "Physical Recycling"."</p> | <p>Polystyvert has developed an innovative and profitable process that allows all forms of polystyrene (PS) to be recycled. Following a unique dissolution, purification, and separation process, the regenerated polystyrene resin is of very high quality, allowing many applications to incorporate 100% recycled materials, at a lower cost than virgin resin.</p> | <p>Executive Summary: Nexus is an operational, commercially-scaled 50 Ton/day plant (first of many) converting waste plastics to feedstocks, which in turn are converted back to virgin plastics. (100% circular). Process is environmentally friendly (no wastewater or air issues), end-to-end business including software, front-end handling, all regulatory requirements, training, strategic pricing/positioning guided by financially-driven metrics. Versus others' Nexus is 1/3'd Capex/ton, 6x more efficient, 20% higher, quality yield, and profitable after paying for plastics, at lower crude-index pricing. Operational and economically proven, Nexus has been shipping tanker loads of offtake and has secured sources/stockpiles of plastics. Now shifting to rapid rollout of plants in US/Globally with ability to construct multi-100 ton/day plants on a jointly owned and operated basis with large strategic partners. (These technologies are not well suited for licensing at early stages given complex,</p> | <p>PSLoop is working on the CreaSolv® Technology which is important to know in advance is a dissolution process so we are not breaking down the polymer into monomer so it's different to chemical recycling technologies. It is a physical recycling process for the polymer chain is not broken. It was developed by CreaCycle together with Fraunhofer IVV. It was developed already some years ago. We recycle PS-foam (EPS and XPS) that comes to us in a compacted form via our members that function as a HUB/collection point. We then shred the material and add a solution that dissolves the polystyrene and allows to filter out any impurities. By addition of an anti-solvent the PS-gel is formed and the HBCD will be in the solvent. Any solvent remaining is distilled and reintroduced in the process. The PS-gel is dried and extruded. The HBCD sludge is further treated at the Bromine Recovery Unit (BRU) of ICL IP which recovers the elemental bromine and safely destroys the HBCD. We focus on the legacy</p> |

|                                            |                                                                                                                                                                                                                                                                                      |                                                                                                                                                                                                                                                                                                               |                                     |                                                                                                                                                                                                                                |                                                                                                                                                                                                                                                                                                                                                                                                                                                                                                                               |
|--------------------------------------------|--------------------------------------------------------------------------------------------------------------------------------------------------------------------------------------------------------------------------------------------------------------------------------------|---------------------------------------------------------------------------------------------------------------------------------------------------------------------------------------------------------------------------------------------------------------------------------------------------------------|-------------------------------------|--------------------------------------------------------------------------------------------------------------------------------------------------------------------------------------------------------------------------------|-------------------------------------------------------------------------------------------------------------------------------------------------------------------------------------------------------------------------------------------------------------------------------------------------------------------------------------------------------------------------------------------------------------------------------------------------------------------------------------------------------------------------------|
|                                            |                                                                                                                                                                                                                                                                                      |                                                                                                                                                                                                                                                                                                               |                                     | resource needs) Nexus is located 20 min from Atlanta airport.                                                                                                                                                                  | HBCD which was included as flame-retardant in PS-foam insulation applications from 1960 – 2015. HBCD is today classified as persistent organic pollutant. Incineration was the only treatment possible. PSLoop now offers a sustainable solution that preserves resources and closes the loop thus contributing to the circular economy.                                                                                                                                                                                      |
| <b>2) What is your business case?</b>      | Saperatec is currently transforming from technology development to a recycling service provider (waste input material processed to secondary raw materials). Saperatec will sell secondary raw materials like recycled polyethylene which are obtained out of the Saperatec process. | The CreaSolv® Process is adapted to specific plastic waste streams by Fraunhofer IVV with CreaSolv® Formulations from CreaCycle. In case of a commercialization Fraunhofer IVV will license the technology and CreaCycle will supply the licensee with CreaSolv® Formulations as specified by Fraunhofer IVV. | Technology licensing business model | Recycling fails if not economic. Nexus is not a technology, but a business focused on resolving the plastics problem technically and economically on a sustained, scaled basis. Please see one-pager attached for more detail. | Start construction end of 2019, starting operation Q1 2021. Set up as a co-operative working with the whole PS value chain with 70 companies across 18 countries in the EU only take in PS from these companies. Current geographic focus for incoming material is in NL and Germany. Funding from EU, province of Zeeland, loans and contributions by members and supporters. It is more economical for companies to provide this PS to PSLoop rather than incineration. Sell product to members to produce new PS products. |
| <b>3) How close are you to break-even?</b> | Currently, Saperatec strives for industrialization of the technology, starting operation in mid 2021.                                                                                                                                                                                | As Chemical Recycling the CreaSolv® Process is still in pilot stage with one pilot plant running and others to be built.                                                                                                                                                                                      |                                     | Operating profitability proven.                                                                                                                                                                                                | The XPS waste is a bit a more complicated because you also have blowing agents HCFCs which makes the XPS waste a hazardous waste. We are now in a working group working on pre-treatment technologies. Based on the Montreal protocol you have to capture the HCFCs with an efficiency of 95 %. Its then more lucrative to bring the                                                                                                                                                                                          |

|                                                         |                                                                                                                                                   |                                                                                                                                                                                                                                                                                                                                                                                                                                                                                                                                                                                                                                                                                                                                                                                                                                                                                                                  |                                                                                                                                                                                  |                                                                                                                                                                                                                                                                                                            |                                                                                                                                                                                                                                                                                                                                                 |
|---------------------------------------------------------|---------------------------------------------------------------------------------------------------------------------------------------------------|------------------------------------------------------------------------------------------------------------------------------------------------------------------------------------------------------------------------------------------------------------------------------------------------------------------------------------------------------------------------------------------------------------------------------------------------------------------------------------------------------------------------------------------------------------------------------------------------------------------------------------------------------------------------------------------------------------------------------------------------------------------------------------------------------------------------------------------------------------------------------------------------------------------|----------------------------------------------------------------------------------------------------------------------------------------------------------------------------------|------------------------------------------------------------------------------------------------------------------------------------------------------------------------------------------------------------------------------------------------------------------------------------------------------------|-------------------------------------------------------------------------------------------------------------------------------------------------------------------------------------------------------------------------------------------------------------------------------------------------------------------------------------------------|
|                                                         |                                                                                                                                                   |                                                                                                                                                                                                                                                                                                                                                                                                                                                                                                                                                                                                                                                                                                                                                                                                                                                                                                                  |                                                                                                                                                                                  |                                                                                                                                                                                                                                                                                                            | hazardous waste to us than to incineration which is very expensive.                                                                                                                                                                                                                                                                             |
| <b>4) Do you use any patented technology?</b>           | We do not use any foreign technology which is protected by patents. In contrast, the saperatec technology is secured by patents.                  | Yes – our partner Fraunhofer as licensor does.                                                                                                                                                                                                                                                                                                                                                                                                                                                                                                                                                                                                                                                                                                                                                                                                                                                                   | Polystyvert owns the recycling technology patents. Patent delivered in Canada and China. Notice of acceptance received for Europe, certificates will be received beginning 2020. | Nexus Intellectual Property protected by Trade Secret, not patents. Not our own, no. Pyrolysis was patented a long time ago (1960s) and patents have since expired.                                                                                                                                        | CreaSolv® developed by CreaCycle and Fraunhofer. Fraunhofer is a partner of PSLoop. CreaCycle will provide the solvent for the plant.                                                                                                                                                                                                           |
| <b>5) Can you provide some details on your process:</b> |                                                                                                                                                   | From website: "On November 8, 2018 Unilever announced that the CreaSolv® Pilot plant is fully operational and they are ready to start examining the technical and commercial viability of this technology6). If successful the process will be commercialized and the technology will be made open source, available also to investors and competitors.<br>The CreaSolv® Plant is designed for high-quality polyethylene (PE) recycling, because 60% of the layers consist of this polymer. The recovered PE will be used for the production of new sachets. The energy consumption for the recycling of 6 kg PE is the same as for the production of 1 kg virgin polymer with the new technology, thus enabling a circular economy with a smaller environmental footprint. The facility currently processes approximately 3 tons sachet waste per day and Unilever invested approximately 10 Millionen Euros)." |                                                                                                                                                                                  |                                                                                                                                                                                                                                                                                                            |                                                                                                                                                                                                                                                                                                                                                 |
| <b>a) feedstock and products</b>                        | Feedstock: industrial waste; products for the first industrial plant: composites of polyethylene (PE), aluminum, polyethylene terephthalate (PET) | PE                                                                                                                                                                                                                                                                                                                                                                                                                                                                                                                                                                                                                                                                                                                                                                                                                                                                                                               | Feedstock: PS waste: mainly EPS, XPS, HIPS.<br>Products: recycled PS pellets                                                                                                     | Feedstocks, plastics (2,4,5,6s) with tolerance for 1,3, 7s and other organics and inorganics. (critical to operating successfully).<br>Products – noncondensables (used in operation), crude middle distillate, wax, char. Crude and wax used as feedstock for virgin plastics production. Char sold as an | EPS and XPS with maximum 7% impurities (<3% water). Products are comparable to virgin PS although exact details will be determined once facility is operational. The whole CreaCycle® Process has been included in the UN Basel Convention as the Best Available Technology (BAT) in the Basel convention general technical guidelines. Product |

|                                           |                                                                                                                                                                                                                                                                                  |             |                                                                                                                                                                                                                                                                    |                                                                                                                                                                      |                                                                                                                                                                                                                                                          |
|-------------------------------------------|----------------------------------------------------------------------------------------------------------------------------------------------------------------------------------------------------------------------------------------------------------------------------------|-------------|--------------------------------------------------------------------------------------------------------------------------------------------------------------------------------------------------------------------------------------------------------------------|----------------------------------------------------------------------------------------------------------------------------------------------------------------------|----------------------------------------------------------------------------------------------------------------------------------------------------------------------------------------------------------------------------------------------------------|
|                                           |                                                                                                                                                                                                                                                                                  |             |                                                                                                                                                                                                                                                                    | additive or heat source for others' operations.                                                                                                                      | distribution depends on the source of PS. The final application will be back in the same application like including in XPS and X-EPS                                                                                                                     |
| <b>b) throughput, production capacity</b> | 18,000 t/a                                                                                                                                                                                                                                                                       | 700 t/a     | Our demo plant is design for 125kg/h. We can design it depending on the customer demand (250 kg/h, 500 kg/h, 1000 kg/h)                                                                                                                                            | 50 Tons (US)/Day is one module. Plants are 100T and can be sized up as needed, operations are already at commercial scale. Numerous redundancies built in.           | 3300 tonnes/year produces 3000 tonnes/year of PS recycle expecting about a 10 % loss in impurities Studies from Germany and Netherlands show that sufficient material is available. Also in rest of Europe material is available.                        |
| <b>c) by-products/ unwanted products</b>  | All fractions of the input material PE/Alu/PET will be products of the process. Most of the separation liquid will be recycled. The remaining chemical loss will be treated with state of the art and proven waste treatment technology in order to comply with all regulations. |             | Materials other than polystyrene; other polymers, other additives (ink, pigmentation for eg).                                                                                                                                                                      | None. Nexus has a pre-cycling section of the plant before conversion, to remove undesired plastics, metals. No air or water issues since the process is closed loop. | HBCD sludge, inerts, (H)CFCs from XPS (removed prior to processing )<br>Carbon black or graphite in the material can stain the final product but as new insulation foams are grey this is not relevant.                                                  |
| <b>d) type of process</b>                 | Core process: liquid-based; pre- and after-treatment processes (like shredding, extrusion,...): all standard industrial processes                                                                                                                                                | Dissolution | Dissolution/Precipitation/Separation<br>Yield: more than 90%                                                                                                                                                                                                       | pyrolysis – closed loop, no incineration, no catalysts, run at atmospheric.                                                                                          | Pre-treatment to remove contamination<br>Compaction for efficient transportation, temperatures should not become too high to avoid possible breaking of the polymer chains<br>Physical dissolution process via the CreaSolv® Process at the PSLoop plant |
| <b>e) process conditions</b>              | confidential                                                                                                                                                                                                                                                                     |             | Industrial conditions.<br>A PLC automatizes and controls the recycling plant. Programming of the automatic machines allows adjusting quantities, temperature areas, and heating and cooling loops. Due to confidential reasons, I can't explain more regarding the |                                                                                                                                                                      | Operators and recyclers are experienced in handling PS and keeping polymer undamaged<br>HBCD is converted in the BRU at 1100 deg Cels into HBR and further converted into bromine and to be used for new brominated                                      |

|                                                                                         |                                                                                                                                                                                                                                                                                                                       |                                                                                                                                                                                                                                                                                                                                                                                                                                                                                                                                                                                                                                                                                                                                                                                                                                                                                                                                                                                                                                                                                                                                                                                                                                                                                                                                          |                                                                                                                                                                                                                                                                            |                                                                                                                                                                                                                                                                                                                                                                                                                                                                                                                                                                                                                                                                                                                                                                                                                                                                                         |                                                                                                                                                                                                                                                                                                                                                                                                                                                                                                                                                                                                                                                                                                                                                                                                       |
|-----------------------------------------------------------------------------------------|-----------------------------------------------------------------------------------------------------------------------------------------------------------------------------------------------------------------------------------------------------------------------------------------------------------------------|------------------------------------------------------------------------------------------------------------------------------------------------------------------------------------------------------------------------------------------------------------------------------------------------------------------------------------------------------------------------------------------------------------------------------------------------------------------------------------------------------------------------------------------------------------------------------------------------------------------------------------------------------------------------------------------------------------------------------------------------------------------------------------------------------------------------------------------------------------------------------------------------------------------------------------------------------------------------------------------------------------------------------------------------------------------------------------------------------------------------------------------------------------------------------------------------------------------------------------------------------------------------------------------------------------------------------------------|----------------------------------------------------------------------------------------------------------------------------------------------------------------------------------------------------------------------------------------------------------------------------|-----------------------------------------------------------------------------------------------------------------------------------------------------------------------------------------------------------------------------------------------------------------------------------------------------------------------------------------------------------------------------------------------------------------------------------------------------------------------------------------------------------------------------------------------------------------------------------------------------------------------------------------------------------------------------------------------------------------------------------------------------------------------------------------------------------------------------------------------------------------------------------------|-------------------------------------------------------------------------------------------------------------------------------------------------------------------------------------------------------------------------------------------------------------------------------------------------------------------------------------------------------------------------------------------------------------------------------------------------------------------------------------------------------------------------------------------------------------------------------------------------------------------------------------------------------------------------------------------------------------------------------------------------------------------------------------------------------|
|                                                                                         |                                                                                                                                                                                                                                                                                                                       |                                                                                                                                                                                                                                                                                                                                                                                                                                                                                                                                                                                                                                                                                                                                                                                                                                                                                                                                                                                                                                                                                                                                                                                                                                                                                                                                          | temperature process in the production line.                                                                                                                                                                                                                                |                                                                                                                                                                                                                                                                                                                                                                                                                                                                                                                                                                                                                                                                                                                                                                                                                                                                                         | polymers for PS foam insulation as well                                                                                                                                                                                                                                                                                                                                                                                                                                                                                                                                                                                                                                                                                                                                                               |
| <b>f) catalyst details (if applicable)</b>                                              | No catalyst is used.                                                                                                                                                                                                                                                                                                  |                                                                                                                                                                                                                                                                                                                                                                                                                                                                                                                                                                                                                                                                                                                                                                                                                                                                                                                                                                                                                                                                                                                                                                                                                                                                                                                                          | N/A                                                                                                                                                                                                                                                                        |                                                                                                                                                                                                                                                                                                                                                                                                                                                                                                                                                                                                                                                                                                                                                                                                                                                                                         |                                                                                                                                                                                                                                                                                                                                                                                                                                                                                                                                                                                                                                                                                                                                                                                                       |
| <b>6) Concerns/opportunities for the future of your system/company?</b>                 | <p>Opportunity: Demand for ecological recycling solutions increases significantly by legal, end-consumer/costumer as well as business perspective. The market of PE/Alu/PET waste, which we focus first, exceeds the capacity of our first plant by multiple times.</p> <p>Concerns: fluctuation of input quality</p> | <p>a. The unwillingness to attach an end-of-life cost ticket to produced polymer to make sure that plastic waste gets a value and sorting and recycling can be paid.</p> <p>b. Concern:<br/> <a href="https://www.linkedin.com/pulse/lacking-recycling-technologies-60-our-plastic-waste-gerald-altнау/">https://www.linkedin.com/pulse/lacking-recycling-technologies-60-our-plastic-waste-gerald-altнау/</a> High-quality recycling needs sophisticated sorting technologies.</p> <p>c. Opportunity:<br/> <a href="https://www.linkedin.com/pulse/plastic-waste-pollution-visible-tragedy-commons-gerald-altнау/">https://www.linkedin.com/pulse/plastic-waste-pollution-visible-tragedy-commons-gerald-altнау/</a> If society would realize how bad it is they should also realize that only investing in recycling can reduce the price paid by all of us with our health.</p> <p>d. Opportunity – the CreaSolv® Process is based on a physical process, thus allowing the recycled polymer to be re-used in the original application. Therefore this process falls into the category of “Physical Recycling” (like Mechanical Recycling)<br/> <a href="https://www.linkedin.com/pulse/what-high-quality-plastic-recycling-gerald-altнау/">https://www.linkedin.com/pulse/what-high-quality-plastic-recycling-gerald-altнау/</a></p> | <p>Scaling up an industrial innovative process is a long-term timeline. It takes times and it is capital intensive.</p> <p>Concerns for the system: optimization. We can always improve the process.</p> <p>Opportunities: our main customers are currently in Europe.</p> | <p>Nexus believes analysis of these technologies should be on both technical AND economical fronts. There are many technologies, but often economics, and essential to supporting a viable business elements are ignored. Some technologies are isolated, ignoring upstream (sourcing feedstock) and downstream (quality specification) impacts and requirements. As a result, some plants have been built, even licensed, and then are unable to deliver. No one or two actions make pyrolysis successful technically/economically – requires 100s of actions done well. This is why Nexus has hardware, software, processes, training, regulatory approvals, engineering, bundled into a business eco-system driven by financial metrics. If need be, we invite you to visit Nexus (15 minutes from Atlanta airport) to see it under NDA, another area that is often over-looked.</p> | <p>Financing, getting everybody on board with a new process. ‘breaking the status quo’</p> <p>The greater opportunity is that we have support of the whole value chain and the political support, but of course now you’re breaking the status quo. Introducing a new route that had gone to incineration for many years but also incineration plants are not too keen on taking PS so it’s a favorable market for us to operate in. Despite the support we have you always face barriers or challenges which you have to overcome because we’re the first ones to do it. For example the notification procedure we are now setting up a new system that no-one knows about it. Can you notify a route that is not yet existing. We are starting up so that natural to have the challenges there.</p> |
| <b>7) What do you see as the major challenges in moving towards a circular economy?</b> | <p>More generic methods like pyrolysis have problems to leverage the full recycling potential of a specific composite material. On the other</p>                                                                                                                                                                      | <p>If authorities and governments will not put binding regulations on producers of polymers and plastic articles to cover the end-of-life treatment cost, cheap solutions will be preferred like syngas and energy recovery.</p>                                                                                                                                                                                                                                                                                                                                                                                                                                                                                                                                                                                                                                                                                                                                                                                                                                                                                                                                                                                                                                                                                                         | <p>Feedstock issues. Collection and sorting issues.</p> <p>Regulation, more implication of all the actor of the supply chain: from the producer of the material, to the consumer, including public</p>                                                                     | <p>Consumer habits. There’s an over-abundance of plastics but even with the best recycling programs, habits still need to be improved. Corporations as</p>                                                                                                                                                                                                                                                                                                                                                                                                                                                                                                                                                                                                                                                                                                                              | <p>Getting everybody onboard to dare to make the change. People have to leave their comfort zone of business as usual.</p>                                                                                                                                                                                                                                                                                                                                                                                                                                                                                                                                                                                                                                                                            |



|                                                                                                                                                                      |                                                                                                                                                                                                                                                                                                                                                                                                                                                                                                                                                                                                          |                     |                                                                                                                                                              |                                                                                                                                                                                                                                                                                              |                                                                                                                                                                                                                                                                                                                                                                                                                                                                                                                    |
|----------------------------------------------------------------------------------------------------------------------------------------------------------------------|----------------------------------------------------------------------------------------------------------------------------------------------------------------------------------------------------------------------------------------------------------------------------------------------------------------------------------------------------------------------------------------------------------------------------------------------------------------------------------------------------------------------------------------------------------------------------------------------------------|---------------------|--------------------------------------------------------------------------------------------------------------------------------------------------------------|----------------------------------------------------------------------------------------------------------------------------------------------------------------------------------------------------------------------------------------------------------------------------------------------|--------------------------------------------------------------------------------------------------------------------------------------------------------------------------------------------------------------------------------------------------------------------------------------------------------------------------------------------------------------------------------------------------------------------------------------------------------------------------------------------------------------------|
|                                                                                                                                                                      | <p>hand, more sophisticated approaches like the Saperatec approach suffer at the moment from mixed input streams or fluctuating quality like in the post-consumer market (yellow bag, green dot). The simpler or standardized the waste stream – the higher will be the recycling rates for the waste and/or the higher the target orientation of the recycling technology like Saperatec ones.</p>                                                                                                                                                                                                      |                     | <p>authorities to induce more sustainable behavior.</p>                                                                                                      | <p>well as packaging needs changing as well to allow for more recyclability.</p>                                                                                                                                                                                                             |                                                                                                                                                                                                                                                                                                                                                                                                                                                                                                                    |
| <p><b>8) What policies do you think need to be implemented (on an international or national level) in order make the circular economy of plastics a reality?</b></p> | <p>The usage of secondary raw materials (recyclates) which have very often ecological benefits has to be in some way beneficial to the plastic processing industry. Oil as fossil resource is relatively cheap for years now so that company's do not change their processes because of economic points of views. At the moment wasting nature has no or only a small price (see emission trading) . Due to Saperatec positive carbon dioxide footprint, a carbon dioxide tax would have positive impact. Another approach would be a legal framework for design for recycling. There are many other</p> | <p>see number 7</p> | <p>Extended producer responsibility<br/>Percentage of recycled content in product<br/>Better collection and sorting for plastics<br/>Carbon tarification</p> | <p>Collection incentives driven by brands and supporting gov'ts, packaging designs, and like other industry – clear, measurable goals. Education and an understanding there are costs/efforts to recycling, but done properly can lead to far greater environment and societal benefits.</p> | <p>Standardized analysis for 100 ppm HBCD – requirement for final product since there is currently no certified method for this.<br/>In some countries there is an agreement that above 1000 ppm it has to be treated through incineration or PSLoop process and in other countries its set at 100 ppm. Need to ensure that there is a market for the recycled product. Policies to stimulate the demand for recycled products in products would help. Make incineration and landfilling even less attractive.</p> |

|                                            |                                                                                                                                                                                     |                                                                      |                                                                                    |                             |                                                                                                                                                       |
|--------------------------------------------|-------------------------------------------------------------------------------------------------------------------------------------------------------------------------------------|----------------------------------------------------------------------|------------------------------------------------------------------------------------|-----------------------------|-------------------------------------------------------------------------------------------------------------------------------------------------------|
|                                            | policies which could lead to positive results.                                                                                                                                      |                                                                      |                                                                                    |                             |                                                                                                                                                       |
| <b>9) In which country do you operate?</b> | At the moment Germany/Europe. It is planned to move to other countries/continents after our first industrial plant is running smoothly and also extend to other application fields. | We are located in Germany but we consider our business to be global. | Demo plant in operation in Canada (Montreal, Qc). Future licensee users in Europe. | Currently US, going global. | Netherlands and Germany, looking to expand across Europe following start-up of current facility. Already have contacts in France that are interested. |
| <b>10) Other</b>                           |                                                                                                                                                                                     |                                                                      |                                                                                    |                             | 4-5 FTE growing to 15-16 FTE by the end of 2020<br>HBCD levels:<br>EPS: 5000 - 10000 ppm<br>XPS: 6000 – 14000 ppm                                     |

### **S3 Life Cycle Analysis of Chemical Recycling Processes**

Transport related emissions from waste transport to the EoL facility is based on the Netherlands:

- Municipal waste collection service:
- 50 km to sorting facility and municipal solid waste incineration (MSWI)
- Transport by >32 tonne lorry using EURO 6 (RER) fuel:
- 150 km from sorting/shredding to EoL treatment plant
- 50 km waste from EoL treatment to MSWI
- 700 km to consumer

Process energy consumption is estimated based on lab scale experiments (100 g) performed at TNO. The EcoInvent3<sup>[26]</sup> database was used to estimate CO<sub>2</sub> emissions from polymer production and packaging manufacture as well as multilayer and electronic products (**Table S9-10**). CO<sub>2</sub> emissions from electricity are estimated based on a majority fossil-based electricity mix of the Netherlands.

**Table S10.** Assumptions regarding material efficiency, product quality and energy consumption for the different EoL analysed in the life cycle analysis for the different plastic waste streams (1 tonne of plastic waste = 710 kg plastic). Process energy consumption is estimated based on lab scale experiments (100 g) performed at TNO. The Ecoinvent3<sup>[26]</sup> database was used to estimate CO<sub>2</sub> emissions from polymer production and packaging manufacture as well as multilayer and electronic products.

| <b>EoL technology</b> | <b>Material efficiency [wt.%]</b>                                                                                | <b>Product quality compared to virgin material [%]</b>                             | <b>Energy consumption [kWh/kg waste]</b>                                                                                  |
|-----------------------|------------------------------------------------------------------------------------------------------------------|------------------------------------------------------------------------------------|---------------------------------------------------------------------------------------------------------------------------|
| Incineration          | -                                                                                                                | -                                                                                  | negligible                                                                                                                |
| Landfill              | -                                                                                                                | -                                                                                  | -                                                                                                                         |
| Energy recovery       | 21 recovered electricity<br>8 recovered heat                                                                     | Electricity assumed to be high voltage Dutch market mix                            | Energy demands are incorporated in the energy recovery efficiency                                                         |
| Pyrolysis (PP-GF)     | <u>For the PP part:</u><br>78 oil<br>14 gas<br>8 solids/char (assumed to be used for heating through combustion) | The assumed products are heavy fuel oil, natural gas and glass fibre (GF)<br>25 GF | 0.6 heating pyrolysis reactor, the remaining 8 are assumed to be recovered from combustion of char                        |
| Mechanical recycling  | 96 for all plastics, except PET 76                                                                               | 50 for all plastics, except PET 66                                                 | <u>Electricity use:</u><br>0.004 shredder<br>0.2 extruder                                                                 |
| Solvolysis            | 90 PET                                                                                                           | 100 PET                                                                            | <u>Electricity use:</u><br>0.004 shredder<br>0.2 extruder<br>0.012 pump<br><u>Steam use:</u><br>0.16                      |
| Dissolution           | 89 ABS/HIPS/PET-PE<br>75 PET<br>95 PP-GF                                                                         | 80 ABS/HIPS/PET-PE<br>100 PET<br><u>For PP-GF:</u><br>90 PP<br>50 GF               | <u>Electricity use:</u><br>0.004 shredder<br>0.2 extruder<br>0.012 pump<br><u>Steam use:</u><br>0.0308 dissolution vessel |

**Table S11.** Main assumptions used in the life cycle analysis for the different plastic waste streams (1 tonne of plastic waste = 710 kg plastic).<sup>[26]</sup>

| Polymer | Composition [wt.%]                                                                                                                       | Carbon content [%] | Lower Heating Value [MJ/kg] |
|---------|------------------------------------------------------------------------------------------------------------------------------------------|--------------------|-----------------------------|
| ABS     | 98 ABS<br>2 carbon black<br>0.00109 tetrabromobisphenol A (TBBPA)                                                                        | 86                 | 35.2                        |
| HIPS    | 100 HIPS<br>Low amount of deca-brominated diphenyl ether (DBDE)                                                                          | 92                 | 37.8                        |
| PET     | 100 PET                                                                                                                                  | 63                 | 23.0                        |
| PET-PE  | 58 PET<br>32 LDPE<br>10 ethylene vinyl alcohol (EVOH)<br>Layer thicknesses[ $\mu\text{m}$ ]:<br>PET 125<br>LDPE 50<br>EVOH 25<br>LDPE 50 | 72                 | 31.2                        |
| PP-GF   | 52 PP<br>46 GF<br>2 carbon black                                                                                                         | 47                 | 17.7                        |

## S4 Analysis of Most Researched Processes and Plastics

### S4.1 Method

For performing this particular analysis a script was developed using the programming language python (packages: json, requests, pandas, codecs, BeautifulSoup, glob, re, numpy, string, nltk). A keyword search in title abstract and author keywords '{chemical recycling} AND plastic' was performed using the Scopus application programming interface (API) yielding 369 initial results. From these initial results, keywords provided by the authors were extracted. The initial 369 research articles were filtered for reviews and the references provided in these reviews were used to extend the list of relevant research articles. For the list of research articles extended in that way, a full-text search was conducted using the Sciencedirect API with access through the network of the University of Utrecht. This way, full-texts of 474 research articles were obtained. and searched for the list of relevant keywords. The list of relevant keywords was compiled by filtering the author keywords for words ending in 'lysis' 'nation' and 'cracking' for process types. For polymer types words containing 'poly' were assembled and for polymer abbreviations words containing 'p' and being no longer than 4 characters were filtered. The visualization of the keyword cloud was performed in the open software gephi version 0.9.2 (gephi.org)<sup>[27]</sup> using the Yifan Hu<sup>[28]</sup> and the label adjust layout algorithms as well as filtering for connections with a weight of at least 4.

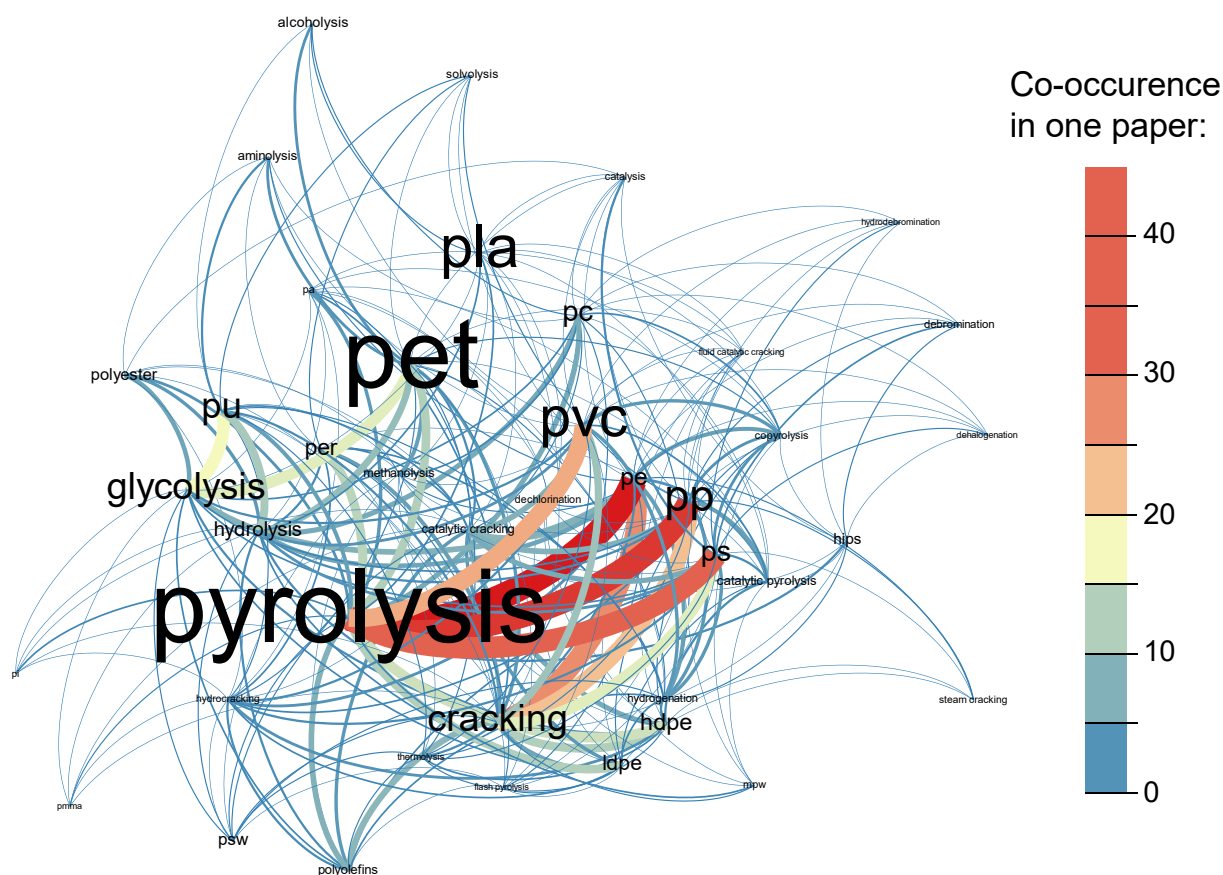

**Figure S1.** Keyword cloud generated to illustrate the most researched processes and plastic types as well as less researched areas. This keyword cloud generated by text-mining 474 articles, because they contained relevant keywords and were cited in relevant reviews. Keywords present author keywords filtered for plastic types and recycling processes. The thickness and colour of the connections between keywords present a measure for the number of times the two connected keywords were mentioned together in the same article. The font-size of the keywords represents how often they appear summed over all analysed journal articles. Occurrences of the acronyms and the long version of polymer names were summed and are presented as the acronym.

**Table S12.** Number of occurrences of the keywords depicted in the keyword cloud in **Figure 3** summed for all analysed articles.

| keyword    | occurrence |
|------------|------------|
| pyrolysis  | 2267       |
| pet        | 2156       |
| pla        | 1236       |
| pvc        | 1166       |
| pp         | 879        |
| glycolysis | 705        |
| cracking   | 690        |
| pu         | 662        |
| pc         | 500        |
| ps         | 498        |
| pe         | 380        |
| hdpe       | 353        |
| per        | 334        |
| ldpe       | 299        |

|                                 |     |
|---------------------------------|-----|
| <b>hydrolysis</b>               | 279 |
| <b>psw</b>                      | 196 |
| <b>polyester</b>                | 193 |
| <b>hips</b>                     | 155 |
| <b>alcoholysis</b>              | 127 |
| <b>aminolysis</b>               | 108 |
| <b>polyolefins</b>              | 107 |
| <b>catalytic pyrolysis</b>      | 104 |
| <b>methanolysis</b>             | 83  |
| <b>catalytic cracking</b>       | 79  |
| <b>solvolysis</b>               | 70  |
| <b>hydrogenation</b>            | 67  |
| <b>debromination</b>            | 66  |
| <b>mpw</b>                      | 50  |
| <b>catalysis</b>                | 47  |
| <b>dechlorination</b>           | 46  |
| <b>pa</b>                       | 44  |
| <b>upr</b>                      | 43  |
| <b>copyrolysis</b>              | 42  |
| <b>hydrocracking</b>            | 34  |
| <b>steam cracking</b>           | 34  |
| <b>pi</b>                       | 15  |
| <b>pmma</b>                     | 14  |
| <b>fluid catalytic cracking</b> | 12  |
| <b>stepwise pyrolysis</b>       | 11  |
| <b>dehalogenation</b>           | 10  |
| <b>flash pyrolysis</b>          | 8   |
| <b>peo</b>                      | 8   |

cracking catalyst 7

hydrodebromination 4

## S5 List of References

- [1] S. D. Anuar Sharuddin, F. Abnisa, W. M. A. Wan Daud, M. K. Aroua, *Energy Convers. Manag.* **2016**, *115*, 308–326.
- [2] S. Kumar, A. K. Panda, R. K. Singh, *Resour. Conserv. Recycl.* **2011**, *55*, 893–910.
- [3] M. Goto, *J. Supercrit. Fluids* **2009**, *47*, 500–507.
- [4] A. Rahimi, J. M. Garcíá, J. M. Garcíá, *Nat. Rev. Chem.* **2017**, *1*, 0046.
- [5] S. L. Wong, N. Ngadi, T. A. T. Abdullah, I. M. Inuwa, *Renew. Sustain. Energy Rev.* **2015**, *50*, 1167–1180.
- [6] D. P. Serrano, J. Aguado, J. M. Escola, *ACS Catal.* **2012**, *2*, 1924–1941.
- [7] J. Aguado, D. P. Serrano, J. M. Escola, *Ind. Eng. Chem. Res.* **2008**, *47*, 7982–7992.
- [8] D. Munir, M. F. Irfan, M. R. Usman, *Renew. Sustain. Energy Rev.* **2018**, *90*, 490–515.
- [9] V. Sinha, M. R. Patel, J. V. Patel, *J. Polym. Environ.* **2010**, *18*, 8–25.
- [10] B. Kunwar, H. N. Cheng, S. R. Chandrashekar, B. K. Sharma, *Renew. Sustain. Energy Rev.* **2016**, *54*, 421–428.
- [11] S. M. Al-Salem, P. Lettieri, J. Baeyens, *Waste Manag.* **2009**, *29*, 2625–2643.
- [12] K. Hamad, M. Kaseem, F. Deri, *Polym. Degrad. Stab.* **2013**, *98*, 2801–2812.
- [13] S. M. Al-Salem, P. Lettieri, J. Baeyens, *Prog. Energy Combust. Sci.* **2010**, *36*, 103–129.
- [14] J. Yu, L. Sun, C. Ma, Y. Qiao, H. Yao, *Waste Manag.* **2016**, *48*, 300–314.
- [15] G. Lopez, M. Artetxe, M. Amutio, J. Bilbao, M. Olazar, *Renew. Sustain. Energy Rev.* **2017**, *73*, 346–368.
- [16] A. K. Panda, R. K. Singh, D. K. Mishra, *Renew. Sustain. Energy Rev.* **2010**, *14*, 233–248.
- [17] E. Butler, G. Devlin, K. McDonnell, *Waste and Biomass Valorization* **2011**, *2*, 227–255.
- [18] D. Simón, A. M. Borreguero, A. de Lucas, J. F. Rodríguez, *Waste Manag.* **2018**, *76*, 147–171.
- [19] R. Miandad, M. A. Barakat, A. S. Aburizaiza, M. Rehan, A. S. Nizami, *Process Saf. Environ. Prot.* **2016**, *102*, 822–838.
- [20] B. A. Miller-Chou, J. L. Koenig, *Prog. Polym. Sci.* **2003**, *28*, 1223–1270.
- [21] Y. B. Zhao, X. D. Lv, H. G. Ni, *Chemosphere* **2018**, *209*, 707–720.
- [22] K. Ragaert, L. Delva, K. Van Geem, *Waste Manag.* **2017**, *69*, 24–58.
- [23] X. Zhang, H. Lei, S. Chen, J. Wu, *Green Chem.* **2016**, *18*, 4145–4169.
- [24] M. Sadat-Shojai, G. R. Bakhshandeh, *Polym. Degrad. Stab.* **2011**, *96*, 404–415.
- [25] *Accelerating Circular Supply Chains for Plastics*, **2019**.
- [26] G. Wernet, C. Bauer, B. Steubing, J. Reinhard, E. Moreno-Ruiz, B. Weidema, *Int. J. Life Cycle Assess.* **2016**, *21*, 1218–1230.
- [27] M. Bastian, S. Heymann, M. Jacomy, *Third Int. AAAI Conf. Weblogs Soc. Media* **2009**.
- [28] Y. Hu, *Math. J.* **2005**, *10*, 37–71.
